# Supplementary material
Source: publisher figshare collection journal article supplement (https://acs.figshare.com/ndownloader/files/5310382)

# Toward Multifunctional Biradicals: Anthracene and Anthraquinone Linkage of Nitronyl and Iminoyl Nitroxides

*Handan Akpinar<sup>‡</sup>, John A. Schlueter<sup>§</sup>, Rafael A. Allão Cassaro<sup>#</sup>, Jonathan R. Friedman<sup>&</sup>,  
Paul M. Lahti<sup>\*‡</sup>*

<sup>‡</sup>Department of Chemistry, University of Massachusetts, Amherst, MA 01003 USA

<sup>§</sup>Division of Materials Research, National Science Foundation, 4201 Wilson Boulevard, Arlington, VA 22230 USA

<sup>#</sup>Instituto de Química, Universidade Federal do Rio de Janeiro, Rio de Janeiro, RJ, 21945-970 Brazil

<sup>&</sup>Department of Physics and Astronomy, Amherst College, Amherst, MA 01002 USA

## Table of Contents

|                                                                                                               |       |
|---------------------------------------------------------------------------------------------------------------|-------|
| <b>Experimental Details for Synthesis and Characterization of Biradicals.</b>                                 | Pg S2 |
| <b>Table S1.</b> Expanded selection of crystallographic intermolecular contacts for biradicals in this study. | S9    |
| <b>Figure S1.</b> ORTEP diagram for <b>BrA27diNN</b> .                                                        | S10   |
| <b>Figure S2.</b> ORTEP diagram for <b>BrA27diIN</b> .                                                        | S10   |
| <b>Figure S3.</b> ORTEP diagram for <b>A27diIN</b> .                                                          | S10   |
| <b>Figure S4.</b> ORTEP diagram for <b>A26diNN</b> .                                                          | S11   |
| <b>Figure S5.</b> ORTEP diagram for <b>A26diIN</b> .                                                          | S11   |
| <b>Crystal Search S1.</b> 9-Substituted anthracene with alternating 9-substituent placement in stack/dyad.    | S12   |
| <b>Figure S6.</b> A27diIN crystallographic contacts between staircase stacks.                                 | S13   |
| <b>Figure S7.</b> A26diIN crystallographic packing, slip-stack and staircase.                                 | S13   |
| <b>Figure S8.</b> Frozen solution ESR spectra (dichloromethane, toluene) for biradicals at 77 K.              | S14   |
| <b>Figure S9.</b> Magnetization versus field plots for biradicals.                                            | S15   |
| <b>Figure S10.</b> Magnetization versus field/temperature plots for A26diNN at 4 K and 1.8 K.                 | S15   |
| <b>Table S2.</b> Computational intramolecular exchange energies for biradicals in this study.                 | S16   |
| Full citation for Gaussian 09, reference 31 in main text.                                                     | S16   |
| <b>Computational summaries for biradicals.</b>                                                                | S17   |

{PML thanks Maureen C. Lahti (née Vickers) for a critical reading of the manuscript. }

## Experimental Details for Synthesis and Characterization of Biradicals.

**General:** All chemicals and solvents were obtained from commercial suppliers and were used as received unless otherwise stated. Infrared spectra were recorded on a Bruker Alpha FTIR spectrometer with attenuated total reflectance sample attachment. <sup>1</sup>H-NMR spectra were recorded on a Bruker AVANCE-400 spectrometer in deuterated solvents, and are reported in ppm down-field of tetramethylsilane. Electron spin resonance (ESR) spectra were recorded on a Bruker Elexsys E-500 in X-band mode. Dr. S. Eyles collected Mass spectrometry data at the UMass-Amherst Mass Spectrometry Facility. Some magnetic measurements were carried out at the UMass Amherst Nanomagnetic Characterization Facility. Some X-ray crystallographic data were carried out at the UMass Amherst X-ray Structural Characterization Lab with assistance from Dr. A. Chandrasekaran.

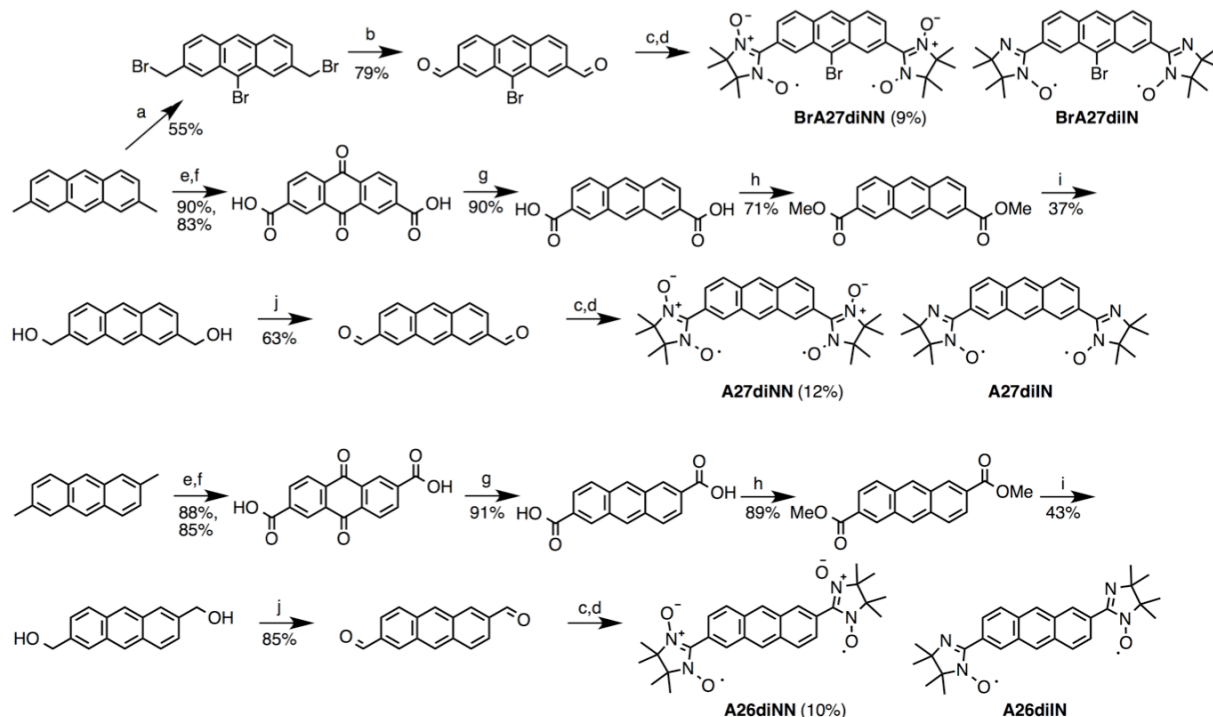

**2,4,4'-Trimethylbenzophenone:** Equivalent weights of *p*-toluoyl chloride (10 g, 64.7 mmol) and *m*-xylene (6.87 g, 64.7 mmol) were mixed and dissolved in dry carbon disulfide (~20 mL). The solution was gradually added to a rapidly stirred suspension of powdered anhydrous aluminum trichloride (10 g) covered with carbon disulfide in a reflux apparatus and cooled with an ice bath. Heat was generated as the aluminum trichloride dissolved to give an orange then dark brown-green solution, and a vapor (hydrogen chloride) was evolved. When addition was complete, the solution was boiled in a hot water bath for 2 h. Water was added cautiously to the reaction mixture, then *m*-xylene and carbon disulfide were distilled away in steam. The residue was extracted with ether, and the combined ether layers were washed multiple times with 10 % NaOH solution then dried over anhydrous magnesium sulfate. After removal of the ether, 2,4,4'-trimethylbenzophenone was obtained as an oily liquid that was sufficiently pure for further use (11.6 g 80%). <sup>1</sup>H NMR (400 MHz, DMSO-*d*<sub>6</sub>): δ 7.63-7.61 (d, 2H, *J* = 8.08 Hz), 7.38-7.36 (d, 2H, *J* = 8.08 Hz), 7.22-7.13 (m, 3H), 2.42 (s, 3H), 2.38 (s, 3H), 2.23 (s, 3H).

**2,7-Dimethylantracene:** 2,4,4'-Trimethylbenzophenone (11.0 g, 49.0 mmol) was vigorously boiled for ~18 h using a sand bath set at ~560 °C. The resulting deep brown liquid solidified on cooling, then was partially purified by sublimation at 2 mm Hg and about 160 °C. Then, further purification was carried out by re-crystallization from glacial acetic acid to give 2,7-

dimethylantracene as light yellow colored crystals (4.04 g, 40%), mp 240-244 °C, lit mp 241 °C<sup>RI</sup>. <sup>1</sup>H NMR (400 MHz, DMSO-*d*<sub>6</sub>): δ 8.49 (s, 1H), 8.35 (s, 1H), 8.00 (d, 2H, *J* = 8.6 Hz), 7.83 (s, 2H), 7.36 (dd, 2H, *J* = 8.6 Hz, *J'* ~ 1 Hz), 2.54 (s, 6H).

**9-Bromo-2,7-bis(bromomethyl)anthracene:** 2,7-Dimethylantracene (0.500 g, 2.42 mmol) and *N*-bromosuccinimide (1.294 g, 7.27 mmol) were placed in 20 mL of CCl<sub>4</sub> and heated under reflux until a flocculent solid floated. After hot filtration, the filtrate was evaporated and the resultant material recrystallized from CCl<sub>4</sub> to yield the product (0.594 g, 55%) as yellow needles with mp 213-215 °C. <sup>1</sup>H NMR (400 MHz, CDCl<sub>3</sub>): δ 8.47 (br s, 2H), 8.39 (s, 1H), 8.00-7.98 (d, 2H, *J* = 8.6 Hz), 7.5-7.53 (dd, 2H, *J* = 8.6 Hz, *J'* = 1.6 Hz), 4.75 (s, 4H). MS (FAB): found *m/z* [intensities normalized to base peak] = 439.8 (34%), 441.8 (100%), 443.8 (96%), 445.8 (33%); calculated for C<sub>16</sub>H<sub>11</sub>Br<sub>3</sub> *m/z* = 439.841 (35%), 441.8391 (100%), 443.837 (97%), 445.8353 (32%).

**9-Bromoanthracene-2,7-dicarbaldehyde:** 9-Bromo-2,7-bis(bromomethyl)anthracene (0.200 g, 0.45 mmol) was added to a solution of 2-nitropropane (0.110 g, 1.22 mmol) in 2.5 mL of 0.5 M NaOEt and 5 mL of absolute ethanol. The yellow suspension was stirred at 50 °C for 30 h, after which the mixture was filtered; the solid was washed with 10% aqueous NaOH then with water, and then was air-dried to give the product (0.112 g, 79%) as a yellow solid, mp 254-256 °C. <sup>1</sup>H NMR (400 MHz, CDCl<sub>3</sub>): δ 10.29 (s, 2H), 9.06 (s, 2H), 8.53 (s, 1H), 8.14-8.12 (d, 2H, *J* = 8.6 Hz), 8.06-8.04 (d, 2H, *J* = 8.6 Hz). IR (KBr, cm<sup>-1</sup>): 1690 (strong, C=O). MS (FAB): found *m/z* = 311.9781; calculated for C<sub>16</sub>H<sub>9</sub>O<sub>2</sub><sup>79</sup>Br *m/z* = 311.97859.

**2,7-Bis(1-oxyl-3-oxo-4,4,5,5-tetramethylimidazolin-2-yl)-9-bromoanthracene (BrA27diNN) and 2,7-Bis(1-oxyl-4,4,5,5-tetramethylimidazolin-2-yl)-9-bromoanthracene (BrA27diIN):** 2,3-Bis(*N*-hydroxylamino)-2,3-dimethylbutane hydrogen sulfate<sup>R2</sup> (0.630 g, 2.56 mmol) and 9-bromoanthracene-2,7-dicarbaldehyde (0.400 g, 1.28 mmol) were dissolved in a mixture of 60 mL of methanol and 40 mL of chloroform. Triethylamine (0.258 g, 2.56 mmol) was added, and the mixture was heated at reflux for 48 h under nitrogen at 75-80 °C. The reaction was then allowed to cool. After evaporation under reduced pressure, the resulting yellow crude product (radical precursor bis(*N*-hydroxyl)imidazoline) was dissolved in 150 mL of dichloromethane. The mixture was then stirred under nitrogen at 0-3 °C in an ice-bath for 15 min and 0.2 M aqueous NaIO<sub>4</sub> (0.547 g, 2.56 mmol in 12.8 mL of H<sub>2</sub>O) was added. A green color formed at once, after which the mixture was stirred for 10 min. Next, 150 mL of cold water was added to the mixture, and the organic layer rapidly extracted with dichloromethane. The combined organic layers were dried over anhydrous magnesium sulfate and evaporated to dryness by rotary evaporation. Chromatography on silica gel with ethyl acetate yielded the product **BrA27diNN** (0.067 g, 9%), which crystallized as dark green needles or prisms from dichloromethane/acetonitrile, mp >300 °C. MS (FAB): found *m/z* = 568.1714; calculated for (C<sub>28</sub>H<sub>31</sub><sup>79</sup>BrN<sub>4</sub>O<sub>4</sub> + 2 H) *m/z* = 566.16852. A small amount of **BrA27diIN** was isolated as a red solid from the chromatography. MS (FAB): found *m/z* = 536.1785, calculated for (C<sub>28</sub>H<sub>31</sub><sup>79</sup>BrN<sub>4</sub>O<sub>2</sub> + 2H) *m/z* = 536.16304.

**2,7-Dimethylantracene-9,10-quinone:** CrO<sub>3</sub> (0.267 g, 2.67 mmol) dissolved in a minimum amount of water was slowly added to a solution of 2,7-dimethylantracene (0.20 g, 0.97 mmol) in boiling glacial acetic acid (20 mL). The resulting solution was then boiled until chromic acid reduced to give a green color (30-45 min); the solution was then allowed to cool and poured into water, giving a precipitate. This solid product was collected by filtration and air-dried to give 2,7-dimethylantracene-9,10-dione as a white solid (0.206 g, 90%), mp 163-166 °C, lit mp 170 °C<sup>RI</sup>. <sup>1</sup>H NMR (400 MHz, DMSO-*d*<sub>6</sub>): δ 8.22-8.20 (d, 2H, *J* = 7.9 Hz), 8.10 (s, 2H), 7.60-7.58 (d, 2H, *J* = 7.9 Hz), 2.18 (s, 6H).

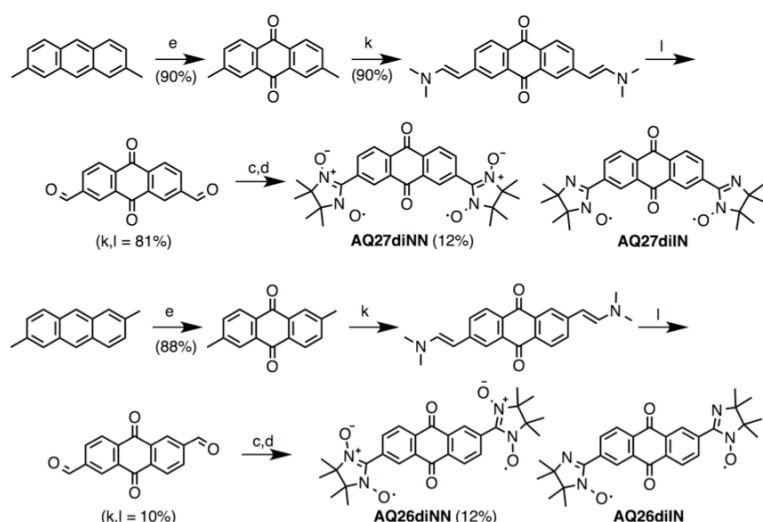

**Anthra-9,10-quinone-2,7-dicarbaldehyde:** *N,N*-Dimethylformamide dimethyl acetal (0.263 g, 2.2 mmol) was added to a solution of 2,7-dimethylantra-9,10-quinone (0.200 g, 0.85 mmol) in dry *N,N*-dimethylformamide (10 ml). This mixture was heated at reflux for 24 h at 140 °C to form a bis-enamine. The reaction was allowed to cool, the solvent removed under vacuum, and the residual crude bis-enamine (0.294 g, 0.85 mmol) was stirred with NaIO<sub>4</sub> (1.28 g, 5.1 mmol) in 12 mL of 50% aqueous THF for 1 h at room temperature. The resulting insoluble material was filtered away and washed with ethyl acetate. The organic filtrate and the ethyl acetate washings were combined, washed with saturated aqueous NaHCO<sub>3</sub> (3 × 20 mL), separated, dried over anhydrous magnesium sulfate, filtered and subjected to rotary evaporation. Chromatography of the resulting solid on silica gel with 50% ethyl acetate: hexane yielded the product (0.183 g, 81%) as a light yellow colored solid, mp 257-260 °C. <sup>1</sup>H NMR (400 MHz, DMSO-*d*<sub>6</sub>): δ 10.31 (s, 2H), 8.79 (br s, 2H), 8.46-8.45 (m, 4H). MS (FAB): found *m/z* = 264.0415, calculated for C<sub>16</sub>H<sub>8</sub>O<sub>4</sub> *m/z* = 264.04171.

**2,7-Bis(1'-oxyl-3'-oxo-4',4',5',5'-tetramethylimidazolin-2'-yl)-9,10-anthraquinone (AQ27diNN):** 2,3-Bis(*N*-hydroxylamino)-2,3-dimethylbutane hydrogen sulfate<sup>R2</sup> (0.573 g, 2.33 mmol) and anthraquinone-2,7-dicarbaldehyde (0.205 g, 0.77 mmol) were dissolved in a mixture of 55 mL of methanol and 30 mL of chloroform. Triethylamine (0.235 g, 2.33 mmol) was added, and the mixture was heated at reflux for 48 h under nitrogen at 75-80 °C. The reaction was then allowed to cool. After evaporation under reduced pressure, the resulting yellow crude product (radical precursor bis(*N*-hydroxyl)imidazoline) was dissolved in 140 mL of dichloromethane. The mixture was stirred under nitrogen at 0-3 °C in an ice-bath for 15 min. Next, 0.2 M aqueous NaIO<sub>4</sub> (0.329 g, 1.54 mmol in 7.70 mL of H<sub>2</sub>O) was added to the mixture. A green color formed at once, after which the mixture was stirred for 10 min. Next, 80 mL of cold water was added to the mixture, and the organic layer rapidly extracted with dichloromethane. The combined organic layers were dried over anhydrous magnesium sulfate and evaporated to dryness by rotary evaporation. Chromatography on silica gel with ethyl acetate yielded the product **AQ27diNN** (0.048 g, 12%), as a brown powder, mp 260-270 °C. In solution, its color is green, but after a few days stored solutions turn brown from biradical decomposition. MS (FAB): found *m/z* = 519.2230, calculated for (C<sub>28</sub>H<sub>30</sub>N<sub>4</sub>O<sub>6</sub>+H) *m/z* = 519.2244; found *m/z* = 518.2165, calculated for C<sub>28</sub>H<sub>30</sub>N<sub>4</sub>O<sub>6</sub> *m/z* = 518.2165. IR (neat, cm<sup>-1</sup>; C=O stretch): 1727 (wk), 1684 (str). A small amount of **AQ27diIN** was isolated as a red solid from the chromatography. MS (FAB): found *m/z* = 487.2338, calculated for (C<sub>28</sub>H<sub>30</sub>N<sub>4</sub>O<sub>4</sub> + H) *m/z* = 487.23453; found *m/z* = 486.1858, calculated for C<sub>28</sub>H<sub>30</sub>N<sub>4</sub>O<sub>4</sub> *m/z* = 486.22745. IR (neat, cm<sup>-1</sup>; C=O stretch): 1725 (wk), 1680 (str).

**Anthra-9,10-quinone-2,7-dicarboxylic acid.** CrO<sub>3</sub> (5.94 g, 59.4 mmol) was added to a solution of conc sulfuric acid (0.2 ml), acetic anhydride (1.5 ml, 16 mmol) and glacial acetic acid (35 ml) cooled at 20 °C in a water-ice bath. 2,7-Dimethylantracene-9,10-dione (1.16 g, 4.9 mmol) was added in small portions with stirring, while the reaction temperature was kept below 35 °C using the ice-water bath. After the addition was complete, the reaction was heated to 120 °C and stirred at this temperature for 4 h. The mixture was then cooled to room temperature and poured into water (400 mL), and the resulting precipitate collected by filtration. The white solid was washed with water and air-dried to give anthracene-9,10-dione-2,7-dicarboxylic acid as a white solid (1.20 g, 83%), mp >300 °C, lit mp >360 °C<sup>R1</sup>. <sup>1</sup>H NMR (400 MHz, DMSO-*d*<sub>6</sub>): δ 13.8 (br s, 2H), 8.74-8.73 (d, 2H, J = 1.5 Hz), 8.47-8.45 (dd, 2H, J = 8.0 Hz, J' = 1.5 Hz), 8.38-8.36 (d, 2H, J = 8.0 Hz).

**Anthracene-2,7-dicarboxylic acid.** This compound was prepared by adapting a procedure by Jones et al.<sup>R3</sup> A mixture of anthracene-9,10-dione-2,7-dicarboxylic acid (1.00 g, 3.38 mmol), Zn powder (3.51 g, 53.7 mmol) and concentrated aqueous ammonia (25 ml) was heated at reflux for 4 h. Additional ammonia (25 mL) was added dropwise throughout the heating. The mixture was then cooled and vacuum filtered, and the filtrate was acidified by dropwise addition of 12 M HCl to give a yellow precipitate. The precipitate was collected by vacuum filtration and air-dried to give anthracene-2,7-dicarboxylic acid as a yellow solid (0.81 g, 90%), mp >300 °C. <sup>1</sup>H NMR (400 MHz, DMSO-*d*<sub>6</sub>): δ 13.5 (br s, 2H), 9.10 (s, 1H), 8.87 (s, 2H), 8.77 (s, 1H), 8.25-8.23 (d, 2H, J = 8.8 Hz), 8.05-8.02 (dd, 2H, J = 8.8 Hz, J' = 1.2 Hz).

**Dimethyl anthracene-2,7-dicarboxylate:** A suspension of anthracene-2,7-dicarboxylic acid (1.10 g, 4.13 mmol), methyl iodide (5.86 g, 41.30 mmol), and lithium carbonate (3.02 g, 41.3 mmol) in dry *N,N*-dimethylformamide (55 mL) was stirred overnight at room temperature. The mixture was added to 1 M aq HCl (204 mL); the resulting yellow precipitate was collected by vacuum filtration and air-dried to give dimethyl anthracene-2,7-dicarboxylate (0.86 g, 71%), mp 226-228 °C, lit mp 222-223 °C<sup>R5</sup>. <sup>1</sup>H NMR (400 MHz, DMSO-*d*<sub>6</sub>): δ 9.16 (s, 1H), 8.91 (s, 2H), 8.80 (s, 1H), 8.30-8.28 (d, 2H, J = 8.8 Hz), 8.06-8.04 (dd, 2H, J = 8.8 Hz, J' = 1.5 Hz), 4.00 (s, 6H).

**2,7-Dihydroxymethylanthracene:** Dimethyl anthracene-2,7-dicarboxylate (0.82 g, 2.79 mmol) was added in small proportions into a suspension of lithium aluminum hydride (0.32 g, 8.36 mmol) in 15 mL of dry diethyl ether cooled with an ice bath. After the addition was complete the reaction mixture was stirred while warming to room temperature overnight. The mixture was then poured into ice and extracted with ethyl acetate. The combined organic layers were washed with brine, dried over anhydrous magnesium sulfate, and evaporated to dryness by rotary evaporation to yield the product as a yellow powder (0.25 g, 37%), mp 236-240 °C. <sup>1</sup>H NMR (400 MHz, DMSO-*d*<sub>6</sub>): δ 8.54 (s, 1H), 8.52 (s, 1H), 8.07-8.05 (d, 2H, J = 8.8 Hz), 7.99 (br s, 2H), 7.49-7.46 (d, 2H, J = 8.8 Hz), 5.40 (t, 2H, J = 5.6 Hz), 4.73 (d, 4H, J = 5.6 Hz).

**Anthracene-2,7-dicarbaldehyde:** 2,7-Dihydroxymethylanthracene (0.500 g, 2.1 mmol) was dissolved in 150 mL of dichloromethane. Manganese(IV) oxide (2.180 g, 25.2 mmol) was added to the solution and the reaction mixture stirred for 2 days at room temperature. The mixture was filtered through Celite, and the filtrate evaporated under vacuum to give the product as a yellow powder (0.312 g, 63%), mp 170-175 °C. <sup>1</sup>H NMR (400 MHz, DMSO-*d*<sub>6</sub>): δ 10.26 (s, 2H), 9.22 (s, 1H), 8.94 (s, 2H), 8.84 (s, 1H), 8.33-8.31 (d, 2H, J = 8.8 Hz), 7.99-7.97 (d, 2H, J = 8.8 Hz). MS (FAB): found *m/z* = 264.0677, calculated for C<sub>16</sub>H<sub>10</sub>O<sub>2</sub> *m/z* = 234.06808.

**2,7-Bis(1-oxyl-3-oxo-4,4,5,5-tetramethylimidazolin-2-yl)anthracene (A27diNN) and 2,7-Bis(1-oxyl-4,4,5,5-tetramethylimidazolin-2-yl)anthracene (A27diIN):** 2,3-Bis(*N*-hydroxylamino)-2,3-dimethylbutane hydrogen sulfate<sup>R2</sup> (0.631 g, 2.56 mmol) and anthracene-2,7-dicarbaldehyde (0.200 g, 0.85 mmol) were dissolved in a mixture of 60 mL of methanol and 40

mL of chloroform. Triethylamine (0.259 g, 2.56 mmol) was added, and the mixture was heated at reflux for 48 h under nitrogen at 75-80 °C. The reaction was then allowed to cool. After evaporation under reduced pressure, the resulting yellow crude product (radical precursor bis(*N*-hydroxyl)imidazoline) was dissolved in 150 mL of dichloromethane. The mixture was then stirred under nitrogen at 0-3 °C in an ice-bath for 15 min. Next, 0.2 M aqueous NaIO<sub>4</sub> (0.363 g, 1.70 mmol in 8.50 mL of H<sub>2</sub>O) was added to the mixture. A green color formed at once, after which the mixture was stirred for 10 min. Next 100 mL of cold water was added to the mixture, and the organic layer rapidly extracted with dichloromethane. The combined organic layers were dried over anhydrous magnesium sulfate and evaporated to dryness by rotary evaporation. Chromatography on silica gel with ethyl acetate yielded the product **A27diIN** (0.048 g, 12%), which forms very dark green, delicate needles from dichloromethane/acetonitrile, mp 244-246 °C. MS (FAB): found  $m/z$  = 488.2427, calculated for C<sub>28</sub>H<sub>32</sub>N<sub>4</sub>O<sub>4</sub>  $m/z$  = 488.2424. A small amount of **A27diIN** was isolated as a red solid from the chromatography. MS (FAB): found  $m/z$  = 456.25161, calculated for C<sub>28</sub>H<sub>32</sub>N<sub>4</sub>O<sub>2</sub>  $m/z$  = 456.25252.

**2,4,3'-Trimethylbenzophenone:** This compound was prepared using the procedure of Morgan and Coulson<sup>RI</sup>. Equivalent weights of *p*-toluoyl chloride (10 g, 64.7 mmol) and *p*-xylene (6.9 g, 64.7 mmol) were mixed and dissolved in carbon disulfide (~20 mL). The solution was gradually added to a powdered anhydrous aluminum trichloride (10 g) covered with carbon disulfide in a reflux apparatus and cooled with an ice bath. Heat was generated as the aluminum trichloride dissolved to give an orange then dark brown-green solution, and a vapor (hydrogen chloride) was evolved. When addition was complete, the solution was boiled in a hot water bath for 2 h. Water was added cautiously to the reaction mixture, then *m*-xylene and carbon disulfide were distilled away in steam. The residue was extracted with ether, and the combined ether layers were washed multiple times with 10% aqueous NaOH solution then dried over anhydrous magnesium sulfate. After filtration and removal of organic volatiles under vacuum, 2,4,3'-trimethylbenzophenone was obtained as oily liquid that was sufficiently pure for further use (11.3 g, 78%). <sup>1</sup>H NMR (400 MHz, DMSO-*d*<sub>6</sub>): δ 7.65-7.63 (d, 2H, *J* = 8.08 Hz), 7.39-7.37 (d, 2H, *J* = 8.08 Hz), 7.28-7.27 (d, 2H, *J* = 3.28 Hz), 7.11 (s, 1H), 2.43 (s, 3H), 2.33 (s, 3H), 2.18 (s, 3H).

**2,6-Dimethylantracene:** 2,4,3'-Trimethylbenzophenone (11.0 g, 49.0 mmol) was vigorously boiled for ~18 h using a sand bath set at ~ 560 °C. The resulting deep brown liquid solidified on cooling, and was partially purified by sublimation. Then, further purification was carried out by re-crystallization from glacial acetic acid. 2,6-Dimethylantracene was obtained as light yellow colored crystals (4.2 g, 42 %), mp 249-252 °C, lit mp 250 °C<sup>RI</sup>. <sup>1</sup>H NMR (400 MHz, DMSO-*d*<sub>6</sub>): δ 8.42 (s, 2H), 8.01-7.99 (d, 2H, *J* = 8.7 Hz), 7.84 (s, 2H), 7.39-7.37 (dd, 2H, *J* = 8.7 Hz, *J'* = 1.5 Hz), 2.54 (s, 6H).

**2,6-Dimethylantra-9,10-quinone:** CrO<sub>3</sub> (4.00 g, 40 mmol) dissolved in a minimum amount of water was slowly added to a solution of 2,6-dimethylantracene (3.00 g, 14.5 mmol) in boiling glacial acetic acid (550 mL). The resulting solution was then boiled until chromic acid reduced to give a green color (30-45 min); the solution was then allowed to cool and poured into water, which precipitated the quinone. This solid product was collected by filtration and air-dried to give 2,6-dimethylantracene-9,10-dione as a white solid (3.012 g, 88%), mp 234-235 °C, lit mp 230 °C (mp 242 °C from acetic acid)<sup>RI</sup>. <sup>1</sup>H NMR (400 MHz, DMSO-*d*<sub>6</sub>): δ 8.16-8.14 (d, 2H, *J* = 7.8 Hz), 8.05 (s, 2H), 7.78-7.76 (d, 2H, *J* = 7.8 Hz), 2.55 (s, 6H). IR (neat, cm<sup>-1</sup>): 1710 (s), 1690 (s), 1675(shoulder).

**Anthra-9,10-quinone-2,6-dicarboxylic acid.** CrO<sub>3</sub> (6.550 g, 65.5 mmol) was added to a solution of conc. sulfuric acid (0.22 ml), acetic anhydride (1.7 ml, 18.1 mmol) and glacial acetic acid (40 ml) cooled at 20 °C in a water-ice bath. 2,6-Dimethylantracene-9,10-dione (1.28 g, 5.4 mmol) was added in small proportions with stirring, while the reaction temperature was kept below 35 °C in the ice-water bath. After the addition was complete, the reaction was heated to 120 °C and stirred at this

temperature for 4 h. The mixture was then cooled to room temperature and poured into water (400 mL), and the resulting precipitate collected by filtration. The white solid was washed with water and air-dried to give anthracene-9,10-dione-2,6-dicarboxylic acid as a white solid (1.36 g, 85%) (lit mp > 300 °C<sup>R3</sup>. <sup>1</sup>H NMR (400 MHz, DMSO-*d*<sub>6</sub>): δ 13.79 (s, 2H), 8.73 (d, 2H, J = 1.5 Hz), 8.48-8.46 (dd, 2H, J = 7.8 Hz, J' = 1.5 Hz), 8.40-8.38 (d, 2H, J = 7.8 Hz).

**Anthracene-2,6-dicarboxylic acid:** A mixture of anthracene-9,10-dione-2,6-dicarboxylic acid (1.52 g, 5.13 mmol), Zn powder (4.74 g, 72.4 mmol) and concentrated aqueous ammonia (40 ml) was heated at reflux for 4 h. Additional ammonia (40 mL) was added dropwise throughout the heating. The mixture was then cooled and vacuum filtered, and the filtrate was acidified by dropwise addition of 12 M HCl to give a yellow precipitate. The precipitate was collected by vacuum filtration and air-dried to give anthracene-2,6-dicarboxylic acid as yellow solid (1.240 g, 91%), mp >300 °C. <sup>1</sup>H NMR (400 MHz, DMSO-*d*<sub>6</sub>): δ 13.2 (br s, 2H), 8.94 (s, 2H), 8.87 (br s, 2H), 8.26-8.24 (d, 2H, J = 8.8 Hz), 8.03-8.00 (dd, 2H, J = 8.8 Hz, J' = 1.5 Hz).

**Dimethyl anthracene-2,6-dicarboxylate:** A suspension of anthracene-2,6-dicarboxylic acid (1.40 g, 5.26 mmol), methyl iodide (7.46 g, 52.6 mmol), and lithium carbonate (3.89 g, 52.6 mmol) in dry *N,N*-dimethylformamide (70 mL) was stirred overnight at room temperature. The mixture was added to 1 M aq HCl (259 ml); the resulting yellow precipitate was collected by vacuum filtration and air-dried to give dimethyl anthracene-2,6-dicarboxylate (1.380 g, 89%), mp 265-270 °C (lit mp 274-276 °C<sup>R3</sup>). <sup>1</sup>H NMR (400 MHz, DMSO-*d*<sub>6</sub>): δ 8.98 (s, 2H), 8.92 (br s, 2H), 8.30-8.27 (d, 2H, J = 8.8 Hz), 8.07-8.02 (dd, 2H, J = 8.8 Hz, J' = 1.8 Hz), 4.00 (s, 6H).

**2,6-Dihydroxymethylanthracene:** Dimethyl anthracene-2,6-dicarboxylate (0.613 g, 2.08 mmol) was added in small proportions into a suspension of lithium aluminum hydride (0.237 g, 6.24 mmol) in 12 ml of dry diethyl ether cooled with an ice bath. After the addition was complete the reaction mixture was stirred while warming to room temperature overnight. The mixture was then poured into ice and extracted with ethyl acetate. The combined organic layers were washed with brine and dried over anhydrous magnesium sulfate, and dried by rotary evaporation to yield 2,6-dihydroxymethylanthracene as a yellow powder (0.213 g, 43%), mp 240-250 °C. <sup>1</sup>H NMR (400 MHz, DMSO-*d*<sub>6</sub>): δ 8.53 (s, 2H), 8.08-8.06 (d, 2H, J = 8.8 Hz), 7.99 (s, 2H), 7.49-7.47 (dd, 2H, J = 8.9 Hz, J' ~ 1 Hz), 5.40 (t, 2H, J = 5.8 Hz), 4.73 (d, 4H, J = 5.5 Hz).

**Anthracene-2,6-dicarbaldehyde:** 2,6-Dihydroxymethylanthracene (0.152 g, 0.64 mmol) was dissolved in 80 mL of dichloromethane. Manganese(IV) oxide (0.666 g, 7.7 mmol) was added to the solution and the reaction mixture stirred for 2 days at room temperature. The mixture was filtered through Celite, and the filtrate evaporated under vacuum to give anthracene-2,6-dicarbaldehyde as yellow powder (0.127 g, 85%), mp 260-265 °C<sup>R4</sup>. <sup>1</sup>H NMR (400 MHz, DMSO-*d*<sub>6</sub>): δ 10.27 (s, 2H), 9.03 (s, 2H), 8.89 (br s, 1H), 8.37-8.27 (d, 2H, J = 8.0 Hz), 8.05-7.95 (dd, 2H, J = 8.0 Hz, J' = 1.3 Hz). MS (FAB): calculated for C<sub>16</sub>H<sub>10</sub>O<sub>2</sub> *m/z* = 234.0681; found *m/z* = 207 (M+2H, loss of -CH=O), *m/z* = 221 (M-CH), no parent ion.

**2,6-Bis(1-oxyl-3-oxo-4,4,5,5-tetramethylimidazolin-2-yl)anthracene (A26diNN) and 2,6-Bis(1-oxyl-4,4,5,5-tetramethylimidazolin-2-yl)anthracene (A26diIN):** 2,3-Bis(*N*-hydroxylamino)-2,3-dimethylbutane hydrogen sulfate<sup>R2</sup> (0.631 g, 2.56 mmol) and anthracene-2,6-dicarbaldehyde (0.200 g, 0.85 mmol) were dissolved in 60 mL of methanol and 40 mL of chloroform. Triethylamine (0.259 g, 2.56 mmol) was added, and the mixture was heated at reflux for 48 h under nitrogen at 75-80 °C. The reaction was then allowed to cool. After evaporation under reduced pressure, the resulting yellow crude product (radical precursor bis(*N*-hydroxyl)imidazoline) was dissolved in 150 mL of dichloromethane. The mixture was stirred under nitrogen at 0-3 °C in an ice-bath for 15 min. Next, 0.2 M aqueous NaIO<sub>4</sub> (0.363 g, 1.70 mmol in 8.50 mL of H<sub>2</sub>O) was added to the mixture. A green color formed at once, after which the mixture was stirred for 10 min. Next, 100 mL of cold water was added to the mixture,

and the organic layer rapidly extracted with dichloromethane. The combined organic layers were dried over anhydrous magnesium sulfate and evaporated to dryness by rotary evaporation. Chromatography on silica gel with ethyl acetate yielded the product **A26diIN** (0.041 g, 10%), which forms delicate dark green needles from dichloromethane/acetonitrile, mp 238-240 °C. MS (FAB): found  $m/z$  = 488.2416, calculated for  $C_{28}H_{32}N_4O_4$   $m/z$  = 488.24236. A small amount of **A26diIN** side product was isolated as a red solid from the chromatography. MS (FAB): found  $m/z$  = 456.2634, calculated for  $C_{28}H_{32}N_4O_2$   $m/z$  = 456.25253.

**Anthra-9,10-quinone-2,6-dicarbaldehyde**: *N,N*-Dimethylformamide dimethyl acetal (1.315 g, 11 mmol) was added to a solution of 2,6-dimethylanthra-9,10-quinone (1.00 g, 4.25 mmol) in dry *N,N*-dimethylformamide (80 mL). This mixture was heated at reflux for 24 h at 140 °C to form a bis-enamine. The reaction was allowed to cool, the solvent removed under vacuum, and the residual crude bis-enamine was stirred with a solution of  $NaIO_4$  (6.415 g, 25.5 mmol) in 60 mL of 50% aqueous THF for 1 h at room temperature. The resulting insoluble material was filtered away and washed with ethyl acetate. The organic filtrate and the ethyl acetate washings were combined, washed with saturated aqueous  $NaHCO_3$  (3 × 100 mL), separated, dried over anhydrous magnesium sulfate, filtered, and subjected to rotary evaporation. Chromatography of the resulting solid on silica gel with 50% ethyl acetate:hexane yielded the product (0.113 g, 10%) as yellow solid, mp 245-255 °C.  $^1H$  NMR (400 MHz, DMSO- $d_6$ ):  $\delta$  10.31 (s, 2H), 8.77 (d, 2H,  $J$  = 1.3 Hz), 8.50-8.43 (AA'BB' q, 4H,  $J$  = 8 Hz,  $J'$  ~ 1 Hz). MS (FAB): found  $m/z$  = 264.0423, calculated for  $C_{16}H_8O_4$   $m/z$  = 264.04171.

**2,7-Bis(1-oxyl-3-oxo-4,4,5,5-tetramethylimidazolin-2-yl)-9,10-anthraquinone (AQ26diNN) and 2,7-bis(1-oxyl-4,4,5,5-tetramethylimidazolin-2-yl)-9,10-anthraquinone (AQ26diIN)**: 2,3-Bis(*N*-hydroxylamino)-2,3-dimethylbutane hydrogen sulfate<sup>R2</sup> (0.280 g, 1.17 mmol) and 9,10-anthraquinone-2,7-dicarbaldehyde (0.100 g, 0.38 mmol) were dissolved in a mixture of 30 mL of methanol and 15 mL of chloroform. Triethylamine (0.112 g, 1.14 mmol) was added, and the mixture was heated at reflux for 48 h under nitrogen at 75-80 °C. The reaction was then allowed to cool. After evaporation under reduced pressure, the resulting yellow crude product (radical precursor bis(*N*-hydroxyl)imidazoline) was dissolved in 70 mL of dichloromethane. The mixture was then stirred under nitrogen at 0-3 °C in an ice-bath for 15 min. Next, 0.2 M aqueous  $NaIO_4$  (0.16 g, 0.75 mmol in 3.80 mL of  $H_2O$ ) was added to the mixture. A green color formed at once, after which the mixture was stirred for 10 min. Next, 40 mL of cold water was added to the mixture, and the organic layer rapidly extracted with dichloromethane. The combined organic layers were dried over anhydrous magnesium sulfate and evaporated to dryness by rotary evaporation. Chromatography on silica gel with ethyl acetate yielded the product **AQ26diNN** (0.012 g, 12%) as a brown powder, mp 215-220 °C. MS (FAB): found  $m/z$  = 518.2169, calculated for  $C_{28}H_{30}N_4O_6$   $m/z$  = 518.21653. IR (neat,  $cm^{-1}$ ; C=O stretch): 1725 (str), 1676 (str). A small amount of **AQ26diIN** side product was isolated as a red solid from the chromatography. MS (FAB): found  $m/z$  = 488.2437, calculated for ( $C_{28}H_{30}N_4O_4 + 2H$ )  $m/z$  = 488.24236. IR (neat,  $cm^{-1}$ ; C=O stretch): 1728 (str), 1677 (str).

-----  
(R1) Morgan, G. T.; Coulson, E. A. *J. Chem. Soc.* **1929**, 2203-2214.

(R2) Ovcharenko, V.; Fokin S.; Rey, P. *Mol. Cryst. Liq. Cryst. Sect. A* **1999**, 334, 109-119.

(R3) Jones J. R.; Liotta, C. L.; Collard D. M.; Schiraldi D. A., *Macromolecules*, **1999**, 32, 5786

(R4) Schwab, M. G.; Hamburger, M.; Feng, X.; Shu, J.; Spiess, H. W.; Wang, X.; Antonietti, M.; Müllen, K. *Chem. Commun.* **2010**, 46, 8932-8934.

(R5) Staab, H. A.; Sauer, M. *Liebigs Ann. Chem.* **1984**, (4), 742-760.



**Table S1.** Expanded selection of crystallographic contacts intermolecular contacts for biradicals in this study

| Compound  | Contact                     | Value        | Compound  | Contact                      | Value       |
|-----------|-----------------------------|--------------|-----------|------------------------------|-------------|
| BrA27diNN | O2 ... O2 <sup>i</sup>      | 3.655(5)*    | BrA27diIN | O1A ... C19 <sup>xv</sup>    | 3.865(11)** |
|           | O2 ... O2 <sup>ii</sup>     | 3.655(5)*    |           | O1A ... C20 <sup>xv</sup>    | 3.942(11)** |
|           | O2 ... N2 <sup>ii</sup>     | 3.390(5)*    |           | O1A ... C25 <sup>xv</sup>    | 3.587(14)** |
|           | O2 ... C9 <sup>ii</sup>     | 3.680(4)*    |           | O1A ... C26 <sup>xv</sup>    | 3.749(15)** |
|           |                             |              |           | O1A ... C27 <sup>xv</sup>    | 3.955(15)** |
|           | O2 ... C13 <sup>ii</sup>    | 3.510(5)**   |           | O1A ... C28 <sup>xv</sup>    | 3.647(13)** |
|           | O2 ... C15 <sup>ii</sup>    | 3.312(4)**   |           | O1B ... N3 <sup>iv</sup>     | 3.895(19)*  |
|           | Br1 ... C2 <sup>vii</sup>   | 2.848(2)     |           | O1B ... C18 <sup>iv</sup>    | 3.698(18)*  |
|           | Br1 ... C3 <sup>vii</sup>   | 3.138(3)     |           | O1B ... C26 <sup>iv</sup>    | 3.74(2)**   |
|           | Br1 ... C14 <sup>viii</sup> | 3.861(3)     |           | O1B ... C22 <sup>xiii</sup>  | 3.36(2)**   |
| A27diIN   | Br1 ... C14 <sup>ix</sup>   | 3.861(3)     |           | O1B ... C21 <sup>xiii</sup>  | 3.89(2)**   |
|           |                             |              |           | O2A ... C21 <sup>xvi</sup>   | 3.726(15)** |
|           | O2 ... N4 <sup>iii</sup>    | 4.593(4)*    |           | O2A ... C21 <sup>xvi</sup>   | 3.850(17)** |
|           | O2... C22 <sup>iii</sup>    | 4.230(5)*    |           | O2A ... C23 <sup>xvii</sup>  | 3.873(17)** |
|           | O2... C18 <sup>iii</sup>    | 3.492(4)**   |           | O2A ... C24 <sup>xvii</sup>  | 3.47(2)**   |
|           | O2... C19 <sup>iii</sup>    | 3.204(4)**   |           |                              |             |
|           | O2... C20 <sup>iii</sup>    | 4.230(5)**   |           | O2B ... N3 <sup>iv</sup>     | 3.895(19)*  |
|           | O2 ... C25 <sup>x</sup>     | 3.565(6)**   |           | O2B ... C18 <sup>iv</sup>    | 3.698(18)*  |
|           | O2... C26 <sup>x</sup>      | 3.688(7)**   |           | O2B ... C21 <sup>xviii</sup> | 3.36(2)**   |
|           | O2 ... C27 <sup>x</sup>     | 3.598(6)**   |           | O2B ... C22 <sup>xiii</sup>  | 3.36(2)**   |
| A26diNN   | O1... C5 <sup>xi</sup>      | 3.70(3)**    | A26diIN   | O2B ... C26 <sup>iv</sup>    | 3.74(2)**   |
|           | O1... C9 <sup>iii</sup>     | 3.71(2)      |           | Br1 ... C5 <sup>iv</sup>     | 3.960(4)    |
|           | O1... C10 <sup>iii</sup>    | 3.77(2)      |           |                              |             |
|           | O1A... C4A <sup>xi</sup>    | 3.56(3)**    |           |                              |             |
|           | O1A... C6A <sup>xi</sup>    | 3.63(3)**    |           |                              |             |
|           | O1A... C9 <sup>iii</sup>    | 3.683(19)    |           |                              |             |
|           | O1A... C10 <sup>iii</sup>   | 3.627(17)    |           |                              |             |
|           |                             |              |           |                              |             |
|           |                             |              |           |                              |             |
|           |                             |              |           |                              |             |
| A26diNN   | O2 ... O2 <sup>v</sup>      | 3.6523(13)*  | A26diIN   | N2 ... C12 <sup>xii</sup>    | 3.523(12)** |
|           | O2 ... N1 <sup>v</sup>      | 3.9338(14)*  |           | O1 ... C12 <sup>xiv</sup>    | 3.311(10)** |
|           | O2 ... N2 <sup>v</sup>      | 3.5189(13)*  |           | O1 ... C13 <sup>xiv</sup>    | 3.622(9)**  |
|           | O2 ... C14 <sup>v</sup>     | 3.9501(14)*  |           | O1 ... C11 <sup>xiv</sup>    | 3.866(10)** |
|           | O1 ... N1 <sup>vi</sup>     | 3.9501(14)*  |           |                              |             |
|           | O1 ... C12 <sup>vi</sup>    | 3.5429(17)** |           |                              |             |
|           | O1 ... C12 <sup>xii</sup>   | 3.6024(15)** |           |                              |             |

Symmetry operations used to generate the molecule in close contact: *i* = *x*, 2-*y*, -1/2+*z*; *ii* = *x*, 2-*y*, 1/2+*z*; *iii* = *x*, *y*, 1+*z*; *iv* = 1-*x*, -*y*, 1-*z*; *v* = 2-*x*, -*y*, -*z*; *vi* = 1-*x*, -*y*, -*z*; *vii* = 1-*x*, *y*, 1/2-*z*; *viii* = 3/2-*x*, 3/2-*y*, 1/2-*z*; *ix* = -1/2+*x*, 3/2-*y*, -*z*; *x* = 3/2-*x*, -1/2+*y*, 1/2+*z*; *xi* = 1-*y*, 1+*x*, 1-*z*; *xii* = 1-*x*, -1/2+*y*, -1/2-*z*; *xiii* = 1+*x*, *y*, *z*; *xiv* = -1/2-*x*, -1/2+*y*, 1/2-*z*; *xv* = 1/2-*x*, 1/2+*y*, 3/2-*z*; *xvi* = 1/2+*x*, 1/2-*y*, 1/2+*z*; *xvii* = -1/2+*x*, 1/2-*y*, 1/2+*z*; *xviii* = 1-*x*, *y*, *z*; \*Direct contact between radical units, both sites of high spin density. \*\*NO to methyl contact.

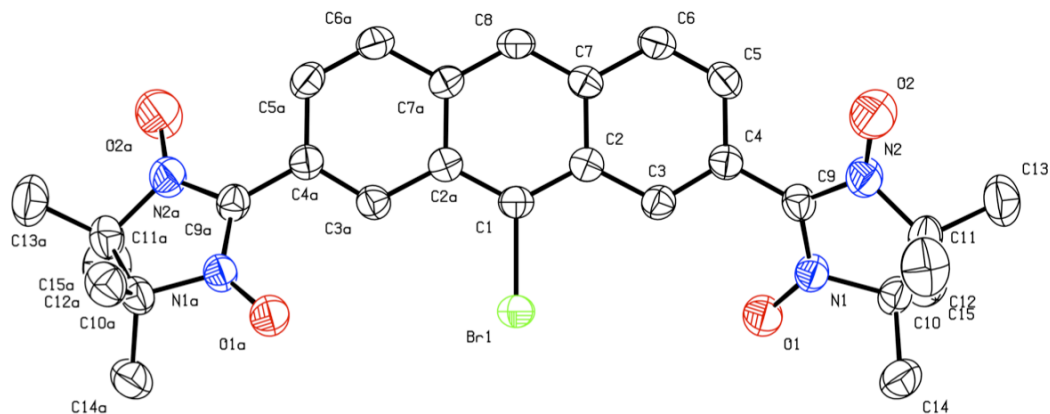

**Figure S1.** ORTEP diagram for **BrA27diNN**. Structure acquired at 293 K. Thermal ellipsoids shown at 50% probability. H-atoms omitted for ease of viewing.

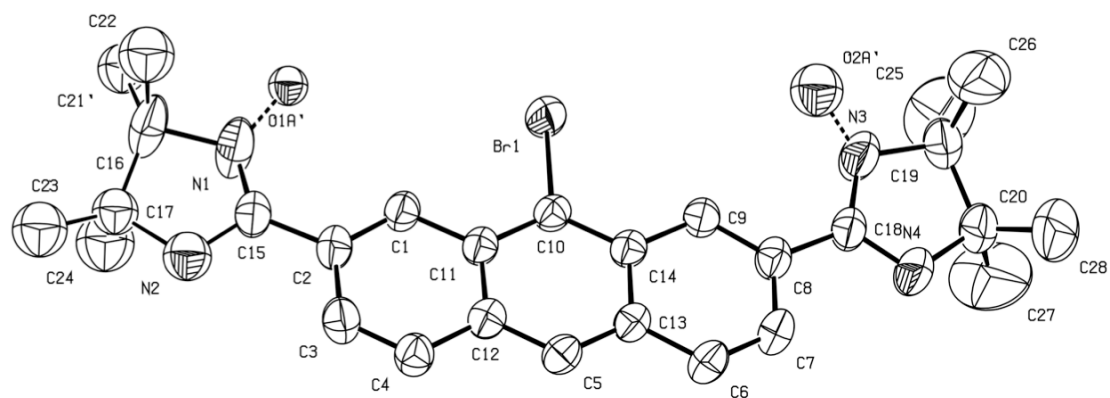

**Figure S2.** ORTEP diagram for **BrA27diIN**. Structure acquired at 293 K. Thermal ellipsoids shown at 50% probability. H-atoms and disordered positions of the iminoyl nitroxide groups are omitted for ease of viewing.

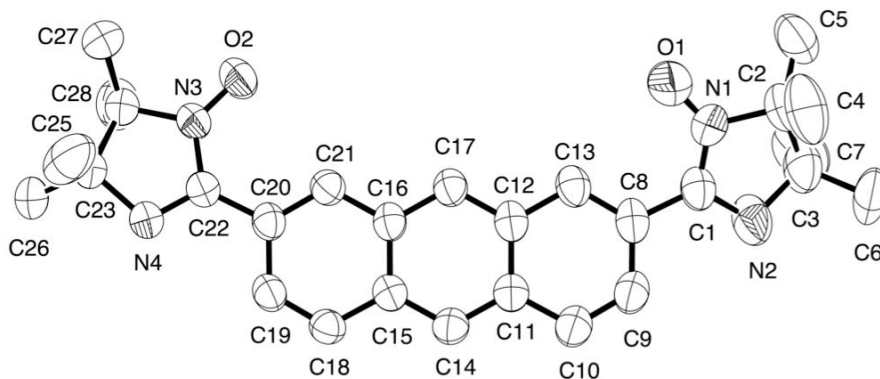

**Figure S3.** ORTEP diagram for **A27diIN**. Structure acquired at 293 K. Thermal ellipsoids shown at 50% probability. H-atoms and disordered positions of the iminoyl nitroxide groups are omitted for ease of viewing.

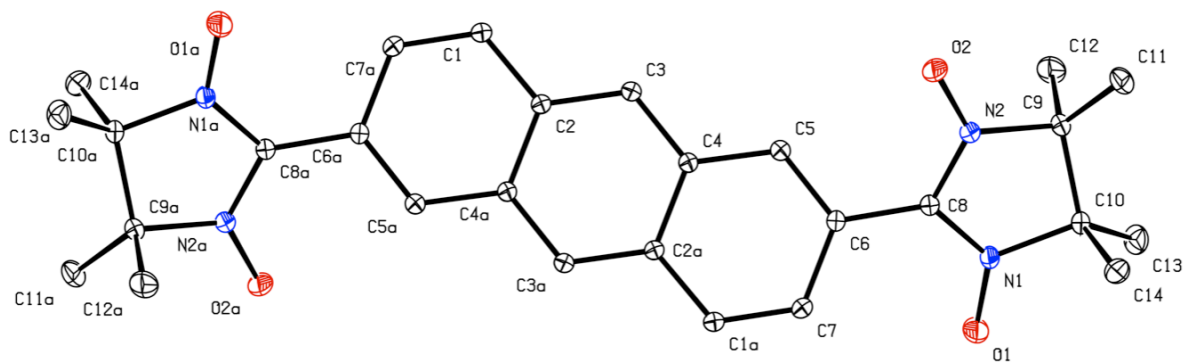

**Figure S4.** ORTEP diagram for **A26diIN**. Structure acquired at 95 K. Thermal ellipsoids shown at 50% probability.

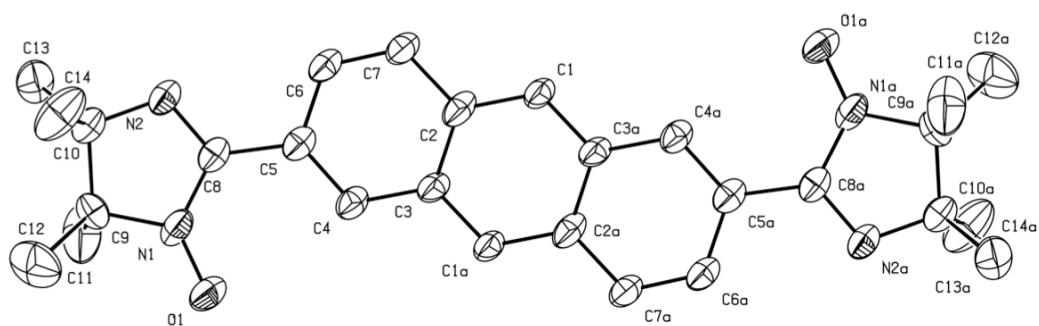

(disorder not shown)

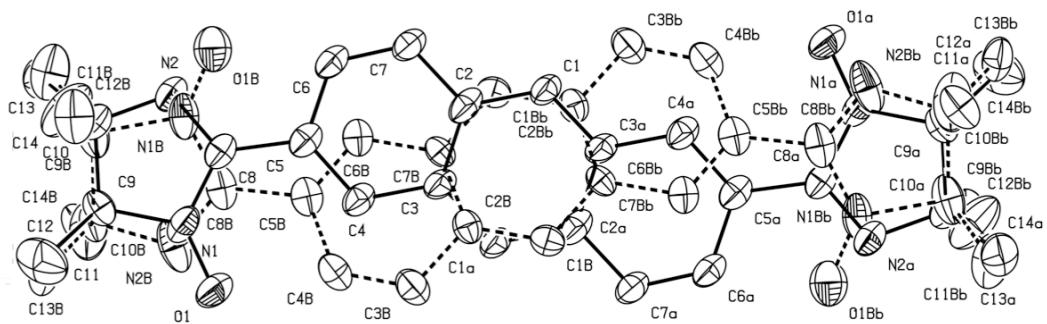

(disorder shown)

**Figure S5.** ORTEP diagram for **A26diIN**. Structure acquired at 296 K. Thermal ellipsoids shown at 50% probability. Rotational disorder of the structure is shown in the lower representation.

**Crystal Search S1.** 9-Substituted anthracenes with alternating 9-substituent placement in stack/dyad.

Search was made of the Cambridge Structure Database using ConQuest (version 1.18, build RC2, © Cambridge Crystallographic Data Centre 20145 CSD version 5.37 November 2015 version) for anthracenes with H in positions 1, 4, 5, 8 and non-H in position 9, no co-crystals, no organometallics, no macrocycles, no compounds with OH, NH, SH hydrogen bonding units, no double-inclusion of anthracene in the structure, no additional attachment of other PAHs like naphthalene, text inclusion for “anthracene”. Core stacking was sought as near planarity between anthracene units, at a core-to-core plane-to-plane distance of < 4 ångstroms. The following listing is not intended to be exhaustive within these criteria, but to demonstrate that the alternating side 9-substituent stack is well-known for anthracenes.

The following structures show *opposing side* dyad or 1-D stack placement of substituents in the 9-position.

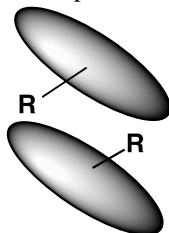

ANNIZUT, ANOBAH, ANOBEL, ANOBOV, ANOCIQ, ANOCUC, AYOTEO (offset, slip-stack), ANOCOW, DEZCAM, FEKVEY, FOGKAO, GASWIG (same and opposite side substitution placement motifs), HIXQOV, JAPYUV, JEYVOZ, JUDXEN, KANMOB, KANMUH, LOGQAA (also slipped along long axis), LOGQEE (slip stack), LOGQII, MANTHR01, MOCANT, NTRANT, NUKMAH (also slipped along long axis), NUKMEL, NUKMIP, NUKMUB, NUKNAI, NUKNOW, OGEDAG, PAXCOI, PECQIZ (also slipped along long axis), PIFJIY, QUESOY, TIVBOQ, WEFDIV, WUPZUD, XAYFOS, YAFPOL

The following structures show *same-side* placement of substituents in the 9-position, often with staircase offset of the anthracene unit along the short molecular axis, occasionally with offset along the long axis.

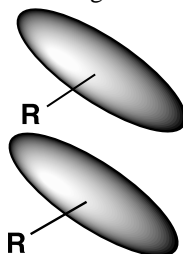

ANOBIP, AYOCIA (slip stack), AYOTEO, CEKNAI, CETMAN (staircase), CNANTH, DASTOG (staircase), DASTUM, ECUMEV, FEKTAS, GASWIG (staircase), HIXQOV, KUBWEJ (staircase), LOGQAA (slip stack) QQQFDS02, UNASIM (also slipped along long axis), WEFDER(staircase), XASMUB (same side)

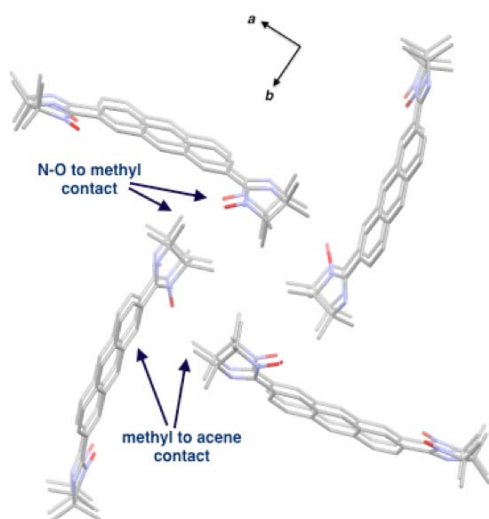

**Figure S6.** A27diIN crystallographic contacts between staircase stacks.

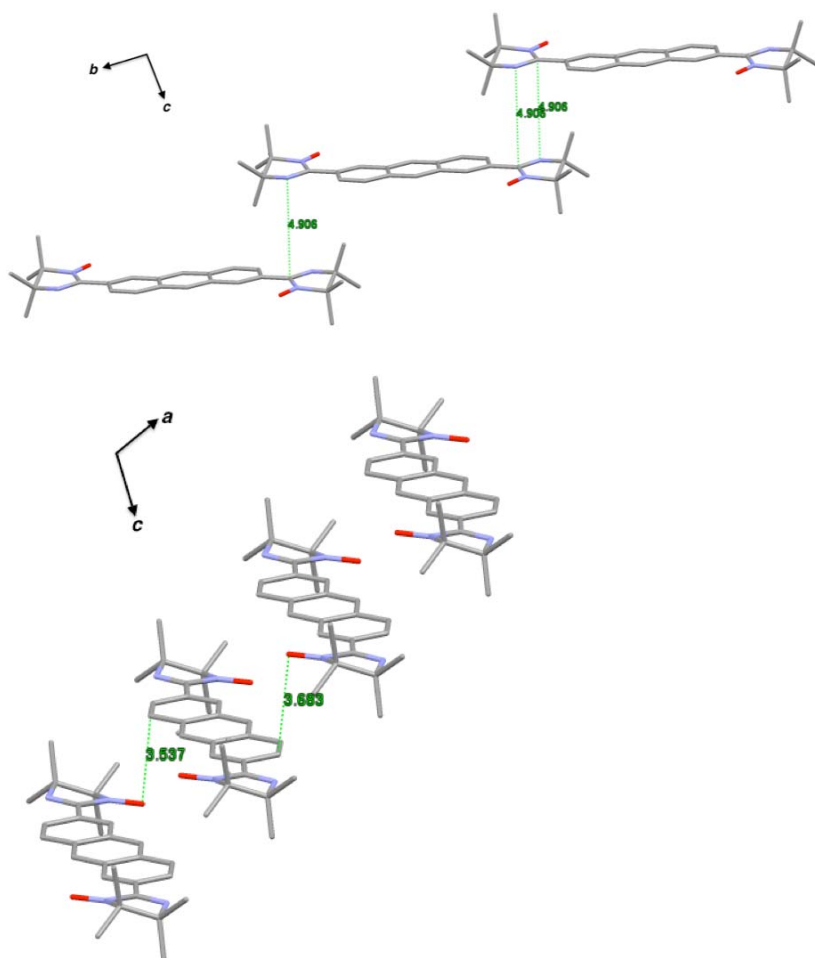

**Figure S7.** A26diIN crystallographic packing; slipstack (above) and staircase stack (below). Distances in angstroms.

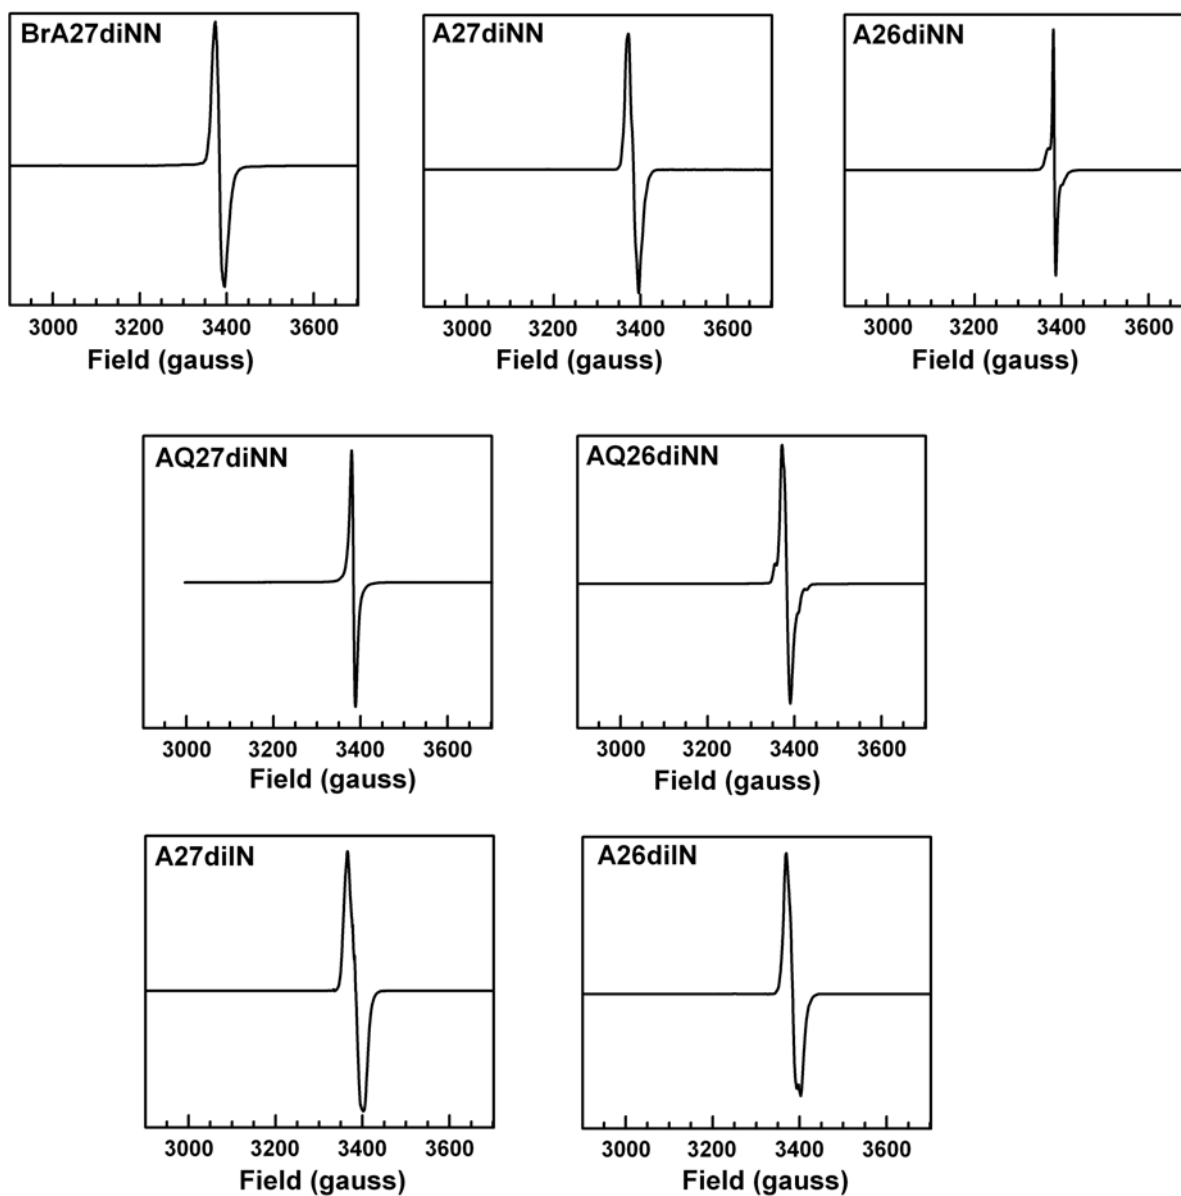

**Figure S8.** Frozen solution ESR spectra (dichloromethane, toluene) for biradicals at 77 K, at  $\nu_0 = 9.37\text{-}9.50$  GHz. No peaks were detected in the half-field region, 1500-1800 G, for any spectra.

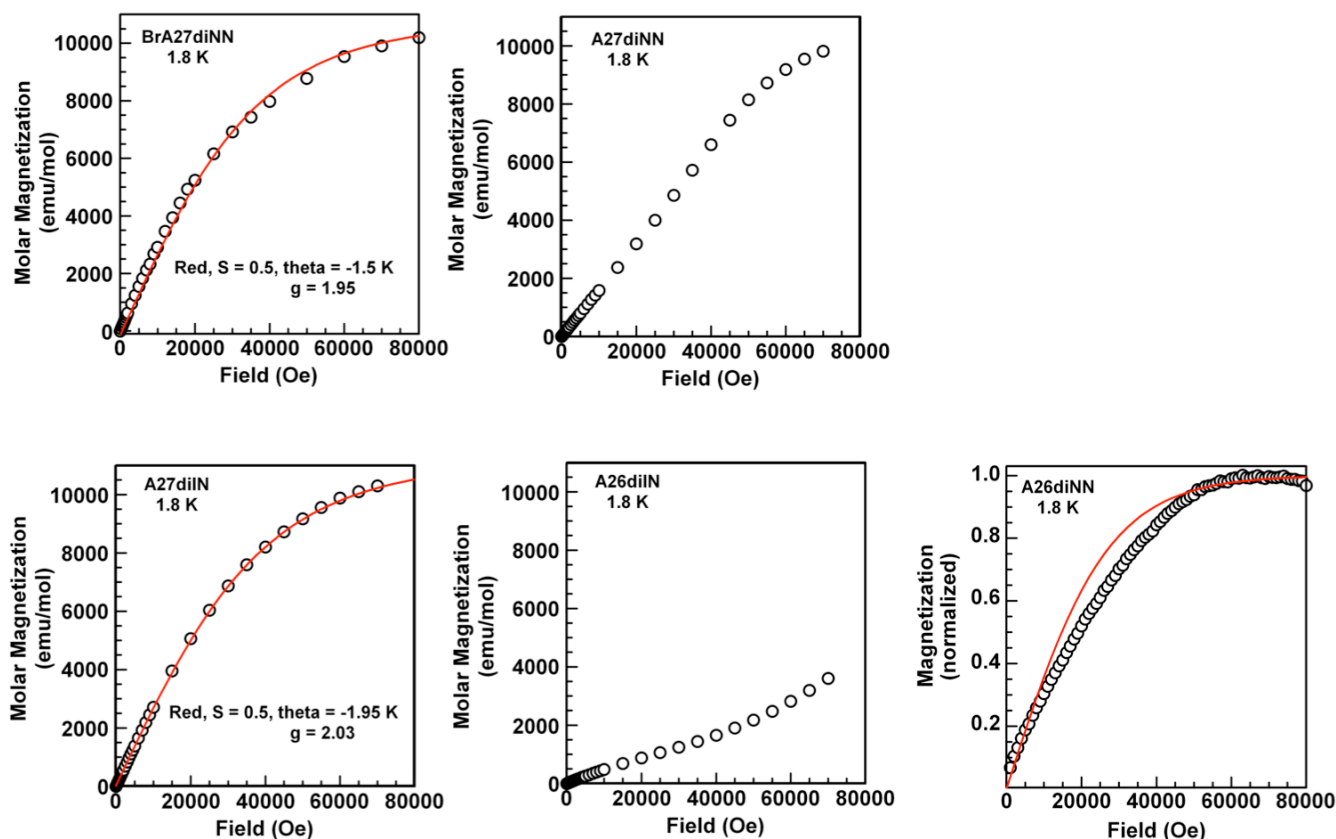

**Figure S9.** Magnetization versus field ( $M$  vs.  $H$ ) plots for biradicals. All plots at 1.8 K using dc magnetometry. Solid lines on selected plots show Brillouin curves for  $S = \frac{1}{2}$  states (with a mean field correction “theta” applied, where shown), scaled on the ordinate to compare to the experimental magnetization data (which approach expected values of two  $S = \frac{1}{2}$  for BrA27diNN, A27diNN, A27diIN biradicals). Most data for A27diNN and all data for A26diIN are well below expected values for two  $S = \frac{1}{2}$  spins, indicative of antiferromagnetic exchange much stronger than a modest mean field correction. Experimental sample magnetization data (emu) for A26diNN with an  $S = \frac{1}{2}$  Brillouin curve (no mean field) are compared, both normalized to their highest values.

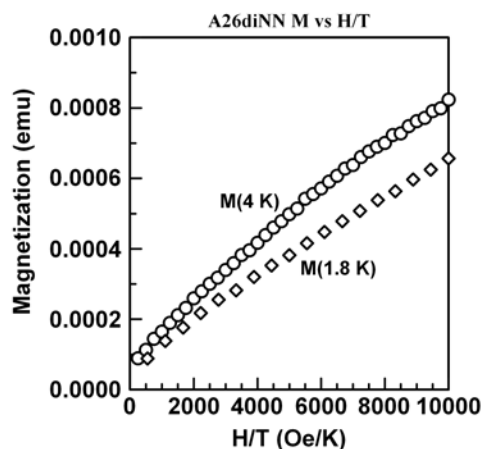

**Figure S10.** Raw magnetization versus field/temperature ( $M$  vs.  $H/T$ ) plots for one sample of A26diNN, measured at 4 K and 1.8 K.

**Table S2.** Computational intramolecular exchange energies for biradicals in this study.

| Compound  | Computational Method | Computed $E_T$<br>( $\langle S^2 \rangle$ ) | Computed $E_S$<br>( $\langle S^2 \rangle$ ) | Computed $\Delta E(T-S)$<br>( $J_{\text{intra}}/k$ ) |
|-----------|----------------------|---------------------------------------------|---------------------------------------------|------------------------------------------------------|
| BrA27diNN | UB97D/6-31G(d)       | -3862.781722 <sup>b</sup><br>(2.039)        | -3862.781696 <sup>c</sup><br>(1.036)        | 69 J/mol <sup>d</sup> (8.3 K <sup>e</sup> )          |
| BrA27diNN | UB3LYP/6-31G(d)      | -3862.524332<br>(2.161)                     | -3862.524044<br>(1.134)                     | 735 (88.5)                                           |
| A27diNN   | UB97D/6-31G(d)       | -1290.540739<br>(2.044)                     | -1290.540691<br>(1.040)                     | 125 (15.0)                                           |
| A27diNN   | UB3LYP/6-31G(d)      | -1291.422424<br>(2.155)                     | -1291.422156<br>(1.131)                     | 685 (82.5)                                           |
| A27diIN   | UB97D/6-31G(d)       | -1140.273823<br>(2.021)                     | -1140.273812<br>(1.019)                     | 30 (3.7)                                             |
| A27diIN   | UB3LYP/6-31G(d)      | -1141.087904<br>(2.042)                     | -1141.087860<br>(1.038)                     | 114 (13.7)                                           |
| A26diNN   | UB97D/6-31G(d)       | -1290.540724<br>(2.039)                     | -1290.540835<br>(1.046)                     | -294 (-35.4)                                         |
| A26diNN   | UB3LYP/6-31G(d)      | -1291.422085<br>(2.127)                     | -1291.422521<br>(1.158)                     | -1178 (-142)                                         |
| A26diIN   | UB97D/6-31G(d)       | -1140.273696<br>(2.019)                     | -1140.27372<br>(1.021)                      | -63 (-7.6)                                           |
| A26diIN   | UB3LYP/6-31G(d)      | -1141.087793<br>(2.037)                     | -1141.087862<br>(1.042)                     | -184 (-22.1)                                         |
| AQ27diNN  | UB97D/6-31G(d)       | -1439.701644<br>(2.042)                     | -1439.701654<br>(1.042)                     | -27 (-3.2)                                           |
| AQ27diNN  | UB3LYP/6-31G(d)      | -1440.665419<br>(2.139)                     | -1440.665431<br>(1.139)                     | -33 (-3.9)                                           |
| AQ27diIN  | UB97D/6-31G(d)       | -1289.432887<br>(2.021)                     | -1289.43289<br>(1.021)                      | -6.0 (-0.7 )                                         |
| AQ27diIN  | UB3LYP/6-31G(d)      | -1290.329505<br>(2.041)                     | -1290.329508<br>(1.041)                     | -6.0 (-0.7 )                                         |
| AQ26diNN  | UB97D/6-31G(d)       | -1439.701717<br>(2.042)                     | -1439.701715<br>(1.042)                     | 6.8 (0.8)                                            |
| AQ26diNN  | UB3LYP/6-31G(d)      | -1440.665495<br>(2.139)                     | -1440.665496<br>(1.139)                     | -2.9 (-0.3)                                          |
| AQ26diIN  | UB97D/6-31G(d)       | -1289.432907<br>(2.021)                     | -1289.432908<br>(1.042)                     | -2.7 (-0.3)                                          |
| AQ26diIN  | UB3LYP/6-31G(d)      | -1290.329642<br>(2.04117)                   | -1290.329644<br>(1.041292)                  | -4.7 (-0.6)                                          |

\*Not determined. <sup>b</sup>Energy in hartrees, triplet optimized geometry. <sup>c</sup>Energy in hartrees, triplet state frozen geometry, unrestricted wavefunction with broken symmetry. <sup>d</sup>Computed triplet-singlet state energy in J/mol, with Yamaguchi correction (eq. S1); triplet state is lower for positive value. <sup>e</sup>Computed triplet-singlet state energy in Kelvin, with Yamaguchi correction (eq. S1); triplet state is lower for positive value.

$$\Delta E(T-S) = \frac{E_S - E_T}{\langle S^2 \rangle_T - \langle S^2 \rangle_S} \quad (\text{Eq. S1})$$

from Yamaguchi, K. A Spin Correction Procedure for Unrestricted Hartree-Fock and Møller-Plesset Wavefunctions for Singlet Diradicals and Polyradicals. *Chem. Phys. Lett.* **1988**, 149, 537-542.



## Computational summaries for biradicals. Computations were carried out using Gaussian 09:

Gaussian 09, Revision B.01, M. J. Frisch, G. W. Trucks, H. B. Schlegel, G. E. Scuseria, M. A. Robb, J. R. Cheeseman, G. Scalmani, V. Barone, B. Mennucci, G. A. Petersson, H. Nakatsuji, M. Caricato, X. Li, H. P. Hratchian, A. F. Izmaylov, J. Bloino, G. Zheng, J. L. Sonnenberg, M. Hada, M. Ehara, K. Toyota, R. Fukuda, J. Hasegawa, M. Ishida, T. Nakajima, Y. Honda, O. Kitao, H. Nakai, T. Vreven, J. A. Montgomery, Jr., J. E. Peralta, F. Ogliaro, M. Bearpark, J. J. Heyd, E. Brothers, K. N. Kudin, V. N. Staroverov, T. Keith, R. Kobayashi, J. Normand, K. Raghavachari, A. Rendell, J. C. Burant, S. S. Iyengar, J. Tomasi, M. Cossi, N. Rega, J. M. Millam, M. Klene, J. E. Knox, J. B. Cross, V. Bakken, C. Adamo, J. Jaramillo, R. Gomperts, R. E. Stratmann, O. Yazyev, A. J. Austin, R. Cammi, C. Pomelli, J. W. Ochterski, R. L. Martin, K. Morokuma, V. G. Zakrzewski, G. A. Voth, P. Salvador, J. J. Dannenberg, S. Dapprich, A. D. Daniels, O. Farkas, J. B. Foresman, J. V. Ortiz, J. Cioslowski, and D. J. Fox, Gaussian, Inc., Wallingford CT, 2010.

A27diIN singlet

```
1\1\GINC-SKYNET\SP\UB97D\6-31G(d)\C20H16N4O2\LAHTI\02-Jan-2015\0\#P G
FINPUT IOP(6/7=3) UB97D/6-31G(d) TEST GUESS=(READ,MIX)\An27tDiIN froz
en triplet geom\0,1\C,0,3.692974,0.375327,0.009356\C,0,1.244004,1.853
669,0.017105\C,0,-1.209731,1.864178,0.024473\C,0,-3.671274,0.406867,0.
031422\C,0,-1.217563,0.411153,0.024153\C,0,1.239385,0.40063,0.01681\C,
0,5.007505,-0.294211,0.0054\N,0,5.172983,-1.704965,0.003172\O,0,4.2947
03,-2.62115,0.003849\C,0,6.630454,-2.019321,-0.000563\C,0,7.252006,-0.
605387,-0.000444\N,0,6.13882,0.360066,0.00355\C,0,-4.991496,-0.251388,
0.035071\N,0,-5.169045,-1.660684,0.035602\O,0,-4.298641,-2.584353,0.03
323\C,0,-6.629152,-1.962553,0.039507\C,0,-7.238575,-0.543348,0.04135\
N,0,-6.117162,0.412542,0.03818\H,0,-6.853716,-2.560464,0.935029\H,0,-6
.858557,-2.560186,-0.854978\H,0,-7.86352,-0.357778,0.930193\H,0,-7.868
652,-0.357659,-0.843835\H,0,6.850217,-2.618045,-0.896732\H,0,6.854402,
-2.619995,0.893269\H,0,7.883355,-0.426195,0.885173\H,0,7.878817,-0.424
077,-0.888854\C,0,-2.466018,-0.285545,0.02768\H,0,-2.458378,-1.372517,
0.02739\C,0,-3.656737,1.850164,0.031754\H,0,-4.61153,2.374024,0.034707
\C,0,-2.470774,2.545401,0.028403\H,0,-2.47375,3.637921,0.02869\C,0,0.0
20081,2.546486,0.020941\H,0,0.024762,3.639776,0.021183\C,0,3.690799,1.
818697,0.009675\H,0,4.650044,2.334362,0.006905\C,0,2.510835,2.524066,0
.013411\H,0,2.523173,3.616521,0.013604\C,0,0.007963,-0.282436,0.020344
\H,0,0.003282,-1.375262,0.020114\C,0,2.481826,-0.306732,0.012906\H,0,2
.464881,-1.393599,0.012712\Version=EM64L-G09RevB.01\State=1-A\HF=-114
0.2738116\S2=1.019472\S2-1=0.\S2A=0.156839\RMSD=7.378e-09\Dipole=0.000
0247,0.0051681,0.0002615\Quadrupole=25.4798841,-11.7900425,-13.6898416
,-0.1596017,-0.1154268,-0.0060285\PG=C01 [X(C20H16N4O2)]\%\e
```

| Mulliken atomic spin densities: |   |           |    |   |           |
|---------------------------------|---|-----------|----|---|-----------|
|                                 |   | 1         |    |   |           |
| 1                               | C | 0.014812  | 21 | H | -0.009827 |
| 2                               | C | -0.001518 | 22 | H | -0.009819 |
| 3                               | C | 0.001516  | 23 | H | 0.018888  |
| 4                               | C | -0.014809 | 24 | H | 0.018898  |
| 5                               | C | -0.002882 | 25 | H | 0.009818  |
| 6                               | C | 0.002884  | 26 | H | 0.009829  |
| 7                               | C | -0.089970 | 27 | C | 0.020280  |
| 8                               | N | 0.323404  | 28 | H | 0.000891  |
| 9                               | O | 0.459062  | 29 | C | 0.005073  |
| 10                              | C | -0.022438 | 30 | H | 0.000413  |
| 11                              | C | -0.014433 | 31 | C | -0.005132 |
| 12                              | N | 0.299878  | 32 | H | 0.000284  |
| 13                              | C | 0.089966  | 33 | C | 0.000001  |
| 14                              | N | -0.323411 | 34 | H | 0.000000  |
| 15                              | O | -0.459066 | 35 | C | -0.005074 |
| 16                              | C | 0.022438  | 36 | H | -0.000413 |
| 17                              | C | 0.014433  | 37 | C | 0.005133  |
| 18                              | N | -0.299863 | 38 | H | -0.000284 |
| 19                              | H | -0.018888 | 39 | C | -0.000002 |
| 20                              | H | -0.018897 | 40 | H | 0.000000  |
|                                 |   |           | 41 | C | -0.020283 |
|                                 |   |           | 42 | H | -0.000891 |

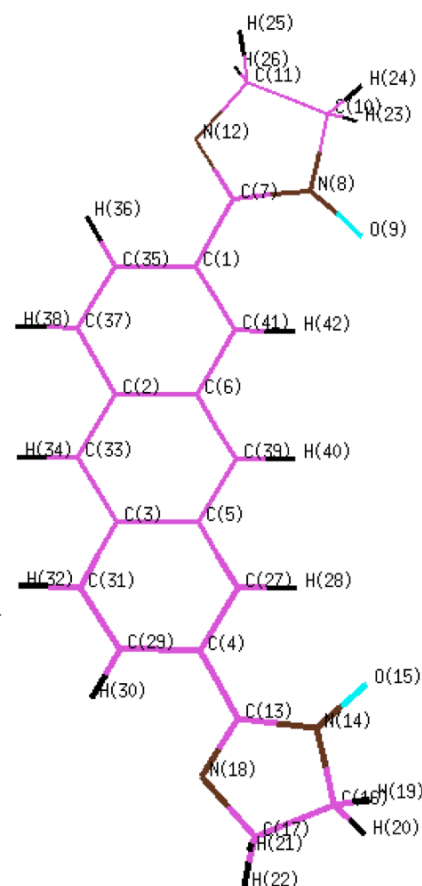

## A27diN triplet

```

1\1\GINC-SKYNET\FOpt\UB97D\6-31G(d)\C20H16N4O2(3)\LAHTI\31-Dec-2014\0\
\#P GFINPUT IOP(6/7=3) UB97D/6-31G(d) TEST OPT\An27tDiNN\0,3\C,3.692
9737748,0.3753273079,0.0093564005\C,1.2440043265,1.8536691562,0.017104
54\C,-1.2097310348,1.8641775164,0.0244728385\C,-3.6712738174,0.4068670
626,0.0314221131\C,-1.2175625727,0.4111534676,0.024152827\C,1.23938522
3,0.4006304796,0.016809618\C,5.0075050131,-0.2942112193,0.0054004472\N
,5.1729830679,-1.7049650778,0.0031715687\O,4.2947028337,-2.6211497646,
0.0038488379\C,6.6304543546,-2.0193211692,-0.0005627913\C,7.2520058763
,-0.6053865674,-0.000444028\N,6.1388196544,0.360065852,0.003550452\C,-
4.9914964252,-0.2513876381,0.0350709741\N,-5.1690452151,-1.6606841493,
0.0356016827\O,-4.2986412143,-2.5843533297,0.0333230356\C,-6.629152269
,-1.9625534186,0.039507181\C,-7.2385753289,-0.5433476752,0.0413496291\
N,-6.1171620278,0.4125416699,0.038180206\H,-6.8537155922,-2.5604644218
,0.935029118\H,-6.8585566424,-2.5601857043,-0.8549778407\H,-7.86351984
72,-0.3577777028,0.9301934277\H,-7.8686523602,-0.3576592772,-0.8438345
47\H,6.8502174402,-2.618044725,-0.896732433\H,6.8544016796,-2.61999533
18,0.8932690264\H,7.8833554805,-0.426195225,0.8851729037\H,7.878816670
5,-0.4240774768,-0.8888541222\C,-2.4660184575,-0.285545466,0.027679770
9\H,-2.4583782711,-1.3725173963,0.0273899552\C,-3.6567371725,1.8501640
133,0.0317537763\H,-4.6115299413,2.3740238806,0.0347066422\C,-2.470774
4632,2.5454008722,0.0284030425\H,-2.473749851,3.6379213759,0.028690136
5\C,0.0200813019,2.546486162,0.0209413106\H,0.0247618679,3.6397760404,
0.0211825803\C,3.6907986386,1.8186967647,0.0096754866\H,4.6500444772,2
.3343622704,0.0069051275\C,2.5108350429,2.5240664315,0.013411186\H,2.5
231730596,3.6165207968,0.0136036798\C,0.0079629777,-0.2824355997,0.020
3438746\H,0.0032820876,-1.3752617182,0.0201136373\C,2.4818264256,-0.30
67316272,0.0129063674\H,2.4648812293,-1.3935994387,0.0127123616\Version=EM64L-G09RevB.01\State=3-A\HF=-1140.2738232\S2=2.020687\S2-1=0.\S2A
=2.000229\RMSE=8.112e-09\RMSF=1.382e-05\Dipole=0.0000186,0.0055132,0.0
002608\Quadrupole=25.4930465,-11.799563,-13.6934835,-0.1597956,-0.1154
812,-0.0060359\PG=C01 [X(C20H16N4O2)]\e

```

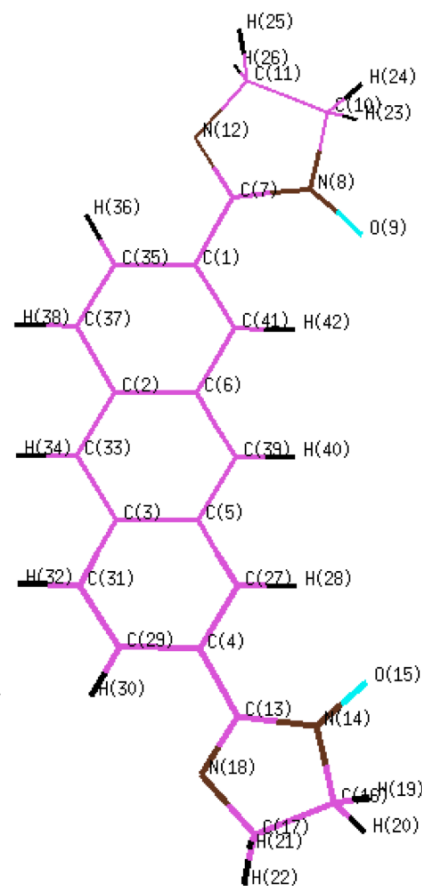

## Mulliken atomic spin densities:

| 1  |   |           | 21 | H | 0.009878  |
|----|---|-----------|----|---|-----------|
| 1  | C | 0.019280  | 22 | H | 0.009870  |
| 2  | C | -0.010516 | 23 | H | 0.018893  |
| 3  | C | -0.010516 | 24 | H | 0.018902  |
| 4  | C | 0.019279  | 25 | H | 0.009869  |
| 5  | C | 0.009110  | 26 | H | 0.009880  |
| 6  | C | 0.009111  | 27 | C | -0.026107 |
| 7  | C | -0.090435 | 28 | H | -0.000637 |
| 8  | N | 0.323502  | 29 | C | -0.012314 |
| 9  | O | 0.459102  | 30 | H | -0.000064 |
| 10 | C | -0.022445 | 31 | C | 0.010675  |
| 11 | C | -0.014489 | 32 | H | -0.000519 |
| 12 | N | 0.300973  | 33 | C | 0.011689  |
| 13 | C | -0.090432 | 34 | H | -0.000534 |
| 14 | N | 0.323510  | 35 | C | -0.012314 |
| 15 | O | 0.459106  | 36 | H | -0.000064 |
| 16 | C | -0.022446 | 37 | C | 0.010675  |
| 17 | C | -0.014488 | 38 | H | -0.000519 |
| 18 | N | 0.300958  | 39 | C | -0.017263 |
| 19 | H | 0.018893  | 40 | H | 0.000790  |
| 20 | H | 0.018902  | 41 | C | -0.026109 |
|    |   |           | 42 | H | -0.000637 |

## A27diN singlet

```

1\1\GINC-SKYNET\SP\UB97D\6-31G(d)\C20H16N4O4\LAHTI\02-Jan-2015\0\#P G
FINPUT IOP(6/7=3) UB97D/6-31G(d) TEST GUESS=(READ,MIX)\Ant27DiN froz
en triplet state opt geom\0,1\H,0,0.000009,-1.449748,0.000007\O,0,-4.
239511,-2.558025,0.758532\O,0,-6.455561,1.273946,-0.796086\N,0,-5.1135
31,-1.726887,0.350347\N,0,-6.174187,0.110921,-0.361037\C,0,0.00001,-0.
357005,0.000042\C,0,-1.228344,0.332321,0.000817\C,0,-2.471554,-0.36750
8,0.00102\H,0,-2.459264,-1.454347,0.015094\C,0,-3.685824,0.318983,-0.0
07902\C,0,-3.678074,1.764137,-0.004951\H,0,-4.625546,2.294661,-0.01688
8\C,0,-2.490454,2.458761,0.002585\H,0,-2.499826,3.551113,0.009026\C,0,
-1.22667,1.786042,0.000736\C,0,0.000014,2.473838,0.000134\H,0,0.000017
,3.567069,0.00017\C,0,-4.952602,-0.409929,-0.007634\C,0,-6.538238,-2.1
66247,0.23004\C,0,-7.271319,-0.895619,-0.211257\O,0,4.239532,-2.558019
,-0.758527\O,0,6.455602,1.273909,0.796171\N,0,5.113554,-1.726888,-0.35
0333\N,0,6.174219,0.110899,0.361087\C,0,1.228367,0.332317,-0.000688\C,
0,2.471574,-0.367517,-0.000939\H,0,2.459279,-1.454354,-0.01508\C,0,3.6

```

85848,0.318968,0.008024\C,0,3.678101,1.764124,0.005171\H,0,4.625574,2.294643,0.017141\C,0,2.490483,2.458752,-0.002317\H,0,2.49986,3.551105,-0.008686\C,0,1.226697,1.786038,-0.000514\C,0,4.952626,-0.409943,0.0077\C,0,6.538264,-2.166248,-0.230069\C,0,7.271356,-0.895619,0.211213\H,0,-6.574018,-2.982406,-0.505035\H,0,-6.848728,-2.550495,1.210753\H,0,-7.981626,-0.506754,0.531656\H,0,-7.77527,-0.978415,-1.18325\H,0,7.981607,-0.506729,-0.531742\H,0,7.775371,-0.978431,1.18317\H,0,6.848728,-2.550492,-1.21079\H,0,6.574067,-2.982408,0.505004\\Version=EM64L-G09RevB.01\\State=1-A\\HF=-1290.540691\\S2=1.039599\\S2-1=0.\\S2A=0.316446\\RMSD=6.216e-09\\Dipole=0.0000051,-0.8504313,-0.0000425\\Quadrupole=29.3426079,-12.9457945,-16.3968134,0.0001387,-4.5143716,0.0004737\\PG=C01 [X(C20H16N4O4)]\\@

|                                 |   |           |  |    |   |           |
|---------------------------------|---|-----------|--|----|---|-----------|
| Mulliken atomic spin densities: |   |           |  |    |   |           |
|                                 |   | 1         |  | 22 | O | 0.328445  |
|                                 |   |           |  | 23 | N | 0.245319  |
| 1                               | H | 0.000000  |  | 24 | N | 0.244598  |
| 2                               | O | -0.327583 |  | 25 | C | 0.004910  |
| 3                               | O | -0.328445 |  | 26 | C | -0.035717 |
| 4                               | N | -0.245319 |  | 27 | H | 0.000861  |
| 5                               | N | -0.244598 |  | 28 | C | 0.023729  |
| 6                               | C | 0.000002  |  | 29 | C | -0.004446 |
| 7                               | C | -0.004912 |  | 30 | H | -0.000530 |
| 8                               | C | 0.035718  |  | 31 | C | 0.005902  |
| 9                               | H | -0.000861 |  | 32 | H | -0.000347 |
| 10                              | C | -0.023731 |  | 33 | C | -0.001200 |
| 11                              | C | 0.004448  |  | 34 | C | -0.126655 |
| 12                              | H | 0.000530  |  | 35 | C | -0.017240 |
| 13                              | C | -0.005904 |  | 36 | C | -0.017263 |
| 14                              | H | 0.000347  |  | 37 | H | -0.011601 |
| 15                              | C | 0.001203  |  | 38 | H | -0.009893 |
| 16                              | C | -0.000002 |  | 39 | H | -0.011496 |
| 17                              | H | 0.000000  |  | 40 | H | -0.009854 |
| 18                              | C | 0.126656  |  | 41 | H | 0.011497  |
| 19                              | C | 0.017241  |  | 42 | H | 0.009853  |
| 20                              | C | 0.017263  |  | 43 | H | 0.009892  |
| 21                              | O | 0.327583  |  | 44 | H | 0.011601  |

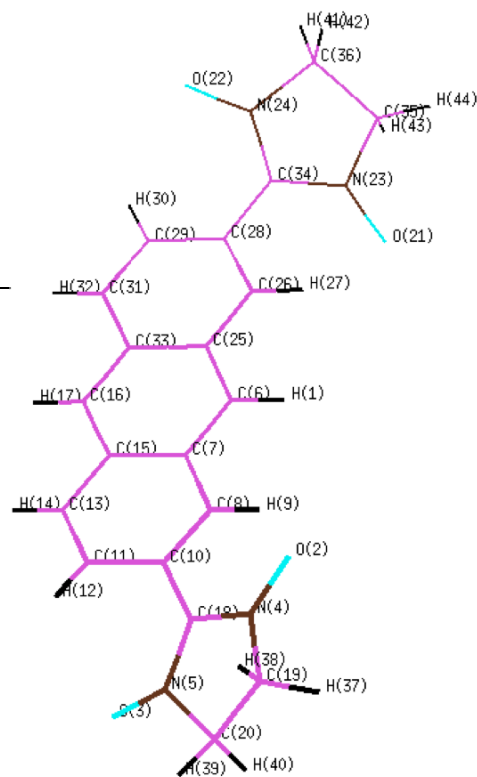

#### A27diNN triplet

1\\GINC-SKYNET\\FOpt\\UB97D\\6-31G(d)\\C20H16N4O4(3)\\LAHTI\\02-Jan-2015\\0\\  
\\#P GFINPUT IOP(6/7=3) UB97D/6-31G(d) TEST OPT\\Ant27DiNN\\0,3\\H,0.000  
0088068,-1.4497481501,0.0000071316\\O,-4.2395112599,-2.5580249254,0.758  
5323468\\O,-6.4555609574,1.2739455051,-0.7960861863\\N,-5.1135309305,-1.  
7268867003,0.3503465007\\N,-6.1741868626,0.1109205026,-0.3610370434\\C,0  
.0000100963,-0.3570047937,0.0000421702\\C,-1.2283442839,0.3323211668,0.  
0008167689\\C,-2.4715542425,-0.3675080958,0.0010199798\\H,-2.4592637692,  
-1.4543470572,0.0150936726\\C,-3.6858244367,0.3189828315,-0.0079023586\\  
C,-3.678074175,1.7641367789,-0.0049511091\\H,-4.6255456566,2.2946613845  
, -0.016887517\\C,-2.4904535743,2.4587612929,0.0025845009\\H,-2.499825860  
4,3.5511133189,0.0090263713\\C,-1.2266700762,1.7860421135,0.0007364456\\  
C,0.0000144889,2.4738383651,0.000134096\\H,0.0000166942,3.5670688222,0.  
0001698805\\C,-4.9526017044,-0.4099291573,-0.0076335334\\C,-6.538237596,  
-2.1662474887,0.230040428\\C,-7.2713189181,-0.8956185173,-0.2112574168\\  
O,4.23953151,-2.5580191901,-0.7585265515\\O,6.4556017923,1.2739092442,0  
.7961714251\\N,5.1135543338,-1.7268879862,-0.3503325627\\N,6.174218887,0  
.1108993429,0.3610865423\\C,1.2283666535,0.3323174976,-0.0006875017\\C,2  
.471573751,-0.3675168525,-0.000938501\\H,2.4592785975,-1.4543544544,-0.  
0150803655\\C,3.6858475264,0.3189679812,0.0080242661\\C,3.6781008778,1.7  
641235153,0.0051705358\\H,4.6255744949,2.2946433327,0.0171411142\\C,2.490  
4828679,2.4587523596,-0.0023167689\\H,2.4998597717,3.5511049201,-0.0086  
857232\\C,1.2266970414,1.7860379879,-0.0005135254\\C,4.9526257625,-0.409  
9426793,0.0076996197\\C,6.5382642738,-2.1662478635,-0.2300689809\\C,7.27  
13561921,-0.8956194755,0.2112126386\\H,-6.5740180193,-2.9824062353,-0.5  
050352865\\H,-6.8487281324,-2.5504948279,1.2107526824\\H,-7.9816260534,-  
0.5067539891,0.5316560508\\H,-7.7752698504,-0.9784152798,-1.1832497568\\  
H,7.9816067213,-0.5067291843,-0.5317417321\\H,7.7753714319,-0.978430822  
8,1.1831695943\\H,6.8487282324,-2.5504921771,-1.2107904791\\H,6.57406655  
38,-2.98240836,0.5050041098\\Version=EM64L-G09RevB.01\\State=3-A\\HF=-12  
90.5407388\\S2=2.043963\\S2-1=0.\\S2A=2.000911\\RMSD=4.620e-09\\RMSF=9.426e  
-06\\Dipole=0.0000059,-0.8504745,-0.0000436\\Quadrupole=29.3444778,-12.9  
46206,-16.3982718,0.0001056,-4.5138531,0.0004793\\PG=C01 [X(C20H16N4O4)  
]\\@

| Mulliken atomic spin densities: |   |           | 23 | N | 0.246048  |
|---------------------------------|---|-----------|----|---|-----------|
| 1                               |   |           | 24 | N | 0.245321  |
| 1                               | H | 0.001757  | 25 | C | 0.017375  |
| 2                               | O | 0.328298  | 26 | C | -0.048781 |
| 3                               | O | 0.329137  | 27 | H | 0.001434  |
| 4                               | N | 0.246047  | 28 | C | 0.032325  |
| 5                               | N | 0.245321  | 29 | C | -0.020320 |
| 6                               | C | -0.038175 | 30 | H | 0.000234  |
| 7                               | C | 0.017376  | 31 | C | 0.016803  |
| 8                               | C | -0.048782 | 32 | H | -0.000806 |
| 9                               | H | 0.001434  | 33 | C | -0.019298 |
| 10                              | C | 0.032326  | 34 | C | -0.127680 |
| 11                              | C | -0.020321 | 35 | C | -0.017277 |
| 12                              | H | 0.000234  | 36 | C | -0.017303 |
| 13                              | C | 0.016804  | 37 | H | 0.011656  |
| 14                              | H | -0.000806 | 38 | H | 0.009933  |
| 15                              | C | -0.019298 | 39 | H | 0.011551  |
| 16                              | C | 0.020229  | 40 | H | 0.009893  |
| 17                              | H | -0.000896 | 41 | H | 0.011552  |
| 18                              | C | -0.127680 | 42 | H | 0.009892  |
| 19                              | C | -0.017277 | 43 | H | 0.009932  |
| 20                              | C | -0.017303 | 44 | H | 0.011656  |
| 21                              | O | 0.328300  | 43 | H | 0.009892  |
| 22                              | O | 0.329136  | 44 | H | 0.011601  |

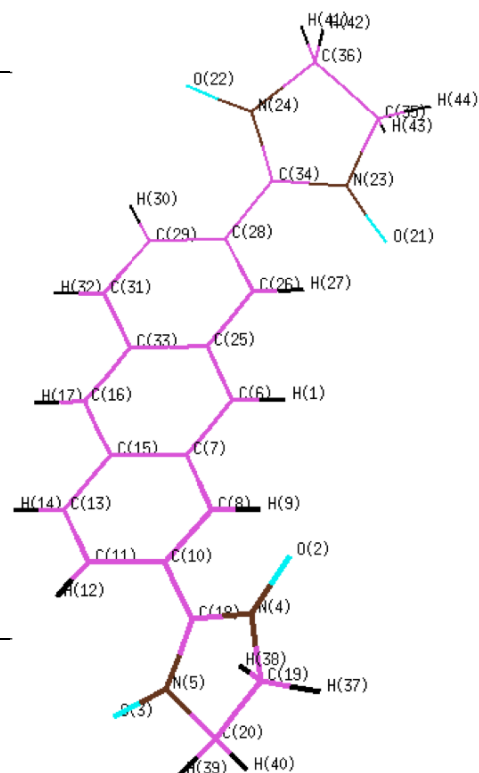

#### AQ27diIN singlet

```

1\1\GINC-SKynet\SP\UB97D\6-31G(d)\C20H14N4O4\LAHTI\02-Jan-2015\0\#P G
FINPUT IOP(6/7=3) UB97D/6-31G(d) TEST GUESS=(READ,MIX)\AntQ27DiIN\0,
1\C,0,3.723285,0.27636,0.074569\C,0,1.277589,1.70001,0.15668\C,0,-1.27
719,1.700386,0.157551\C,0,-3.72336,0.277462,0.076986\C,0,-1.280822,0.2
86081,0.076317\C,0,1.28075,0.285701,0.075499\C,0,5.044713,-0.390046,0.
036259\N,0,5.212945,-1.794192,-0.044265\O,0,4.338222,-2.708451,-0.0966
8\C,0,6.674139,-2.101537,-0.061912\C,0,7.289043,-0.687023,0.01909\N,0,
6.170423,0.271695,0.074121\C,0,-5.045007,-0.388526,0.038983\N,0,-5.213
702,-1.792843,-0.037487\O,0,-4.339281,-2.707644,-0.085257\C,0,-6.67499
6,-2.099628,-0.056601\C,0,-7.289434,-0.684678,0.020214\N,0,-6.170498,0
.273772,0.073469\H,0,-6.899097,-2.746455,0.803957\H,0,-6.896379,-2.648
09,-0.983632\H,0,-7.91715,-0.547802,0.915593\H,0,-7.915847,-0.450989,-
0.855817\H,0,6.896658,-2.648014,-0.989831\H,0,6.89671,-2.750383,0.7975
35\H,0,7.91624,-0.552737,0.915216\H,0,7.916097,-0.451252,-0.855934\C,0
,-2.49905,-0.416785,0.03654\H,0,-2.470711,-1.500787,-0.025641\C,0,-3.7
09711,1.694824,0.158291\H,0,-4.659823,2.226874,0.189176\C,0,-2.504568,
2.391425,0.197737\H,0,-2.484825,3.479534,0.260205\C,0,0.000329,2.47910
3,0.201741\C,0,3.710108,1.69373,0.155834\H,0,4.660398,2.225494,0.18617
4\C,0,2.505198,2.390688,0.196033\H,0,2.485815,3.478806,0.258452\C,0,-0
.000165,-0.495318,0.030847\C,0,2.498745,-0.417525,0.034942\H,0,2.47004
5,-1.501517,-0.027256\O,0,0.000535,3.712602,0.272467\O,0,-0.000371,-1.
726329,-0.040164\Version=EM64L-G09RevB.01\State=1-A\HF=-1289.4328897\
S2=1.021341\S2=1=0.\S2A=0.171295\RMSD=5.337e-09\Dipole=-0.0000245,-0.2
478765,-0.01476\Quadrupole=40.0253189,-26.8312527,-13.1940663,-0.01025
54,-0.0135372,-0.759631\PG=C01 [X(C20H14N4O4)]\@

```

| Mulliken atomic spin densities: |   |           | 21 | H | 0.010717  |
|---------------------------------|---|-----------|----|---|-----------|
| 1                               |   |           | 22 | H | 0.010678  |
| 1                               | C | -0.016868 | 23 | H | -0.017922 |
| 2                               | C | 0.010909  | 24 | H | -0.017925 |
| 3                               | C | -0.010907 | 25 | H | -0.010696 |
| 4                               | C | 0.016866  | 26 | H | -0.010698 |
| 5                               | C | 0.007484  | 27 | C | -0.016656 |
| 6                               | C | -0.007486 | 28 | H | -0.000861 |
| 7                               | C | 0.092142  | 29 | C | -0.011664 |
| 8                               | N | -0.305024 | 30 | H | -0.000159 |
| 9                               | O | -0.457845 | 31 | C | 0.005731  |
| 10                              | C | 0.021522  | 32 | H | -0.000260 |
| 11                              | C | 0.015219  | 33 | C | -0.000001 |
| 12                              | N | -0.320888 | 34 | C | 0.011666  |
| 13                              | C | -0.092141 | 35 | H | 0.000158  |
| 14                              | N | 0.305024  | 36 | C | -0.005733 |
| 15                              | O | 0.457845  | 37 | H | 0.000261  |
| 16                              | C | -0.021521 | 38 | C | 0.000001  |

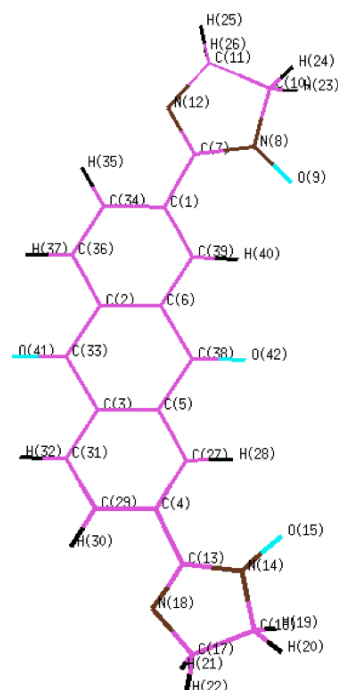

|    |   |           |    |   |           |
|----|---|-----------|----|---|-----------|
| 17 | C | -0.015219 | 39 | C | 0.016658  |
| 18 | N | 0.320887  | 40 | H | 0.000861  |
| 19 | H | 0.017908  | 41 | O | 0.000001  |
| 20 | H | 0.017939  | 42 | O | -0.000001 |

# AQ27diN triplet

```

1\1\GINC-SKYNET\FOpt\UB97D\6-31G(d)\C20H14N4O4(3)\LAHTI\31-Dec-2014\0\
\#P GFINPUT IOP(6/7=3) UB97D/6-31G(d) TEST OPT\AQ27tDiN\0,3\C,3.723
2849258,0.2763602734,0.0745690381\C,1.2775894817,1.7000103024,0.156679
7624\C,-1.2771903917,1.7003860858,0.1575505538\C,-3.7233597931,0.27746
17675,0.0769859856\C,-1.2808222668,0.2860812624,0.0763170264\C,1.28074
96161,0.2857011291,0.0754994844\C,5.0447128082,-0.3900455328,0.0362585
747\N,5.2129453818,-1.7941918442,-0.044264815\O,4.3382219219,-2.708451
1777,-0.0966800862\C,6.6741386894,-2.1015366856,-0.061911907\C,7.28904
32856,-0.6870232906,0.0190895482\N,6.1704225041,0.2716945765,0.0741208
23\C,-5.0450068661,-0.3885263926,0.0389830297\N,-5.213702404,-1.792842
616,-0.0374866641\O,-4.339281131,-2.7076441267,-0.0852569383\C,-6.6749
963369,-2.0996277069,-0.0566012139\C,-7.2894335829,-0.6846781815,0.020
2139945\N,-6.1704983168,0.2737715712,0.0734690951\H,-6.8990968596,-2.7
464553576,0.8039574697\H,-6.8963785138,-2.6480899428,-0.9836316947\H,-
7.9171497672,-0.5478021598,0.9155928767\H,-7.9158472635,-0.4509885979,
-0.8558168583\H,6.8966584849,-2.6480136823,-0.9898314694\H,6.896710121
9,-2.7503828165,0.7975349521\H,7.9162395047,-0.552736785,0.9152156926\
H,7.9160966565,-0.451252279,-0.8559338247\C,-2.4990495645,-0.416784599
9,0.0365398609\H,-2.4707108095,-1.5007866636,-0.0256412503\C,-3.709710
5078,1.6948242506,0.1582905557\H,-4.6598230656,2.2268739596,0.18917554
57\C,-2.5045683476,2.3914250762,0.1977374436\H,-2.4848245337,3.4795338
327,0.2602047548\C,0.0003295,2.4791033462,0.2017409007\C,3.7101082591,
1.6937301859,0.1558344239\H,4.6603979676,2.2254943698,0.1861737514\C,2
.5051980006,2.390688115,0.196033271\H,2.4858145028,3.478806262,0.25845
21496\C,-0.0001649725,-0.49531793,0.0308466455\C,2.4987445286,-0.41752
49274,0.0349422604\H,2.4700452335,-1.5015166074,-0.0272555482\O,0.0005
350937,3.7126021467,0.2724666821\O,-0.0003711737,-1.7263286092,-0.0401
638821\Version=EM64L-G09RevB.01\State=3-A\HF=-1289.4328874\S2=2.02122
3\S2-1=0.\S2A=2.000235\RMSD=6.208e-09\RMSF=3.561e-06\Dipole=-0.0000322
,-0.2479322,-0.0147652\Quadrupole=40.0227376,-26.8292866,-13.193451,-0
.0102888,-0.0135421,-0.7595536\PG=C01 [X(C20H14N4O4)]\@

```

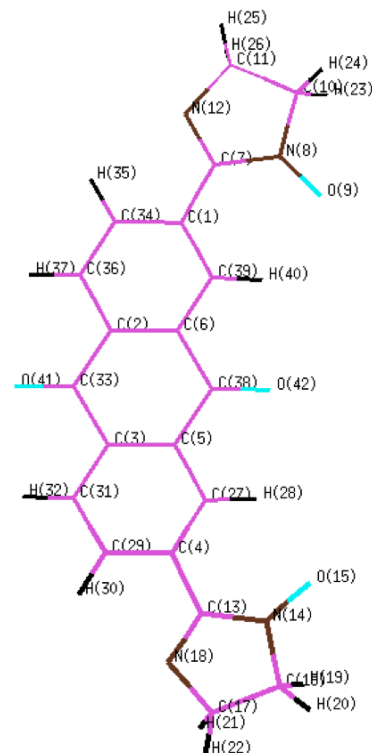

| Mulliken atomic spin densities: |   |           |    |   |           |
|---------------------------------|---|-----------|----|---|-----------|
| 1                               |   |           | 21 | H | 0.010709  |
| 1                               | C | 0.016376  | 22 | H | 0.010671  |
| 2                               | C | -0.010932 | 23 | H | 0.017922  |
| 3                               | C | -0.010932 | 24 | H | 0.017924  |
| 4                               | C | 0.016376  | 25 | H | 0.010689  |
| 5                               | C | 0.007173  | 26 | H | 0.010691  |
| 6                               | C | 0.007173  | 27 | C | -0.016560 |
| 7                               | C | -0.092064 | 28 | H | -0.000869 |
| 8                               | N | 0.305008  | 29 | C | -0.011595 |
| 9                               | O | 0.457806  | 30 | H | -0.000157 |
| 10                              | C | -0.021520 | 31 | C | 0.005553  |
| 11                              | C | -0.015213 | 32 | H | -0.000240 |
| 12                              | N | 0.320763  | 33 | C | 0.001950  |
| 13                              | C | -0.092064 | 34 | C | -0.011595 |
| 14                              | N | 0.305008  | 35 | H | -0.000157 |
| 15                              | O | 0.457805  | 36 | C | 0.005553  |
| 16                              | C | -0.021520 | 37 | H | -0.000240 |
| 17                              | C | -0.015213 | 38 | C | -0.001407 |
| 18                              | N | 0.320764  | 39 | C | -0.016560 |
| 19                              | H | 0.017907  | 40 | H | -0.000869 |
| 20                              | H | 0.017938  | 41 | O | -0.005109 |
|                                 |   |           | 42 | O | 0.003055  |

## AQ27diNN singlet

```

1\1\GINC-SKYNET\SP\UB97D\6-31G(d)\C20H14N4O6\LAHTI\02-Jan-2015\0\#P G
FINPUT IOP(6/7=3) UB97D/6-31G(d) TEST GUESS=(READ,MIX)\AntQ27DiNN tri
plet opt geom\0,1\0,0,-0.000044,-1.716952,0.000016\O,0,4.293486,-2.52
7848,-0.928216\O,0,6.462967,1.209531,0.883246\N,0,5.155004,-1.735716,-
0.435652\N,0,6.198936,0.063693,0.398751\C,0,-0.000025,-0.483989,-0.000
027\C,0,1.279887,0.299848,-0.008555\C,0,2.495057,-0.401784,-0.023611\H
,0,2.466657,-1.487502,-0.046583\C,0,3.724909,0.293522,-0.012346\C,0,3.
714176,1.714459,0.008229\H,0,4.655219,2.256888,0.030346\C,0,2.503949,2
.406942,0.007074\H,0,2.485728,3.496815,0.01219\C,0,1.276503,1.718261,0
.000695\C,0,0.000019,2.498788,-0.000095\O,0,0.000037,3.734664,-0.00010
2\C,0,4.990958,-0.438757,-0.016189\C,0,6.577571,-2.184757,-0.294888\C,
0,7.293135,-0.950786,0.266832\O,0,-4.293289,-2.527673,0.928196\O,0,-6.
463149,1.209446,-0.883348\N,0,-5.154909,-1.735623,0.435681\N,0,-6.1990
03,0.063673,-0.398761\C,0,-1.279914,0.299886,0.008472\C,0,-2.495104,-0
.401707,0.023566\H,0,-2.466739,-1.487425,0.046598\C,0,-3.724937,0.2936
3,0.012262\C,0,-3.714164,1.714569,-0.008348\H,0,-4.655189,2.257027,-0.
030461\C,0,-2.503915,2.407015,-0.007228\H,0,-2.485661,3.496887,-0.0123
75\C,0,-1.276488,1.718299,-0.000841\C,0,-4.990974,-0.438668,0.016174\C
,0,-6.577443,-2.184783,0.294974\C,0,-7.293123,-0.950881,-0.26675\H,0,6
.585742,-3.05361,0.377007\H,0,6.923403,-2.493519,-1.290256\H,0,8.05707
4,-0.530433,-0.401246\H,0,7.726458,-1.096397,1.265235\H,0,-8.057057,-0
.53056,0.401353\H,0,-7.726489,-1.096559,-1.265125\H,0,-6.923216,-2.493
553,1.290361\H,0,-6.585566,-3.05365,-0.376904\Version=EM64L-G09RevB.0
1\State=1-A\HF=-1439.7016542\S2=1.041985\S2-1=0.\S2A=0.335237\RMSD=9.9
95e-09\Dipole=0.0000637,-1.1646109,0.0001234\Quadrupole=44.2746054,-27
.2508045,-17.0238009,0.0011331,-4.455377,-0.0002766\PG=C01 [X(C20H14N4
O6)]\@

```

## Mulliken atomic spin densities:

|                                |   |           |    |   |           |
|--------------------------------|---|-----------|----|---|-----------|
| Unklike atomic spin densities: |   |           | 22 | O | -0.328289 |
|                                | 1 |           | 23 | N | -0.241093 |
| 1                              | O | -0.000002 | 24 | N | -0.244432 |
| 2                              | O | 0.334803  | 25 | C | -0.010567 |
| 3                              | O | 0.328278  | 26 | C | 0.023407  |
| 4                              | N | 0.241095  | 27 | H | -0.000373 |
| 5                              | N | 0.244431  | 28 | C | -0.025153 |
| 6                              | C | 0.000002  | 29 | C | 0.022557  |
| 7                              | C | 0.010563  | 30 | H | -0.000431 |
| 8                              | C | -0.023404 | 31 | C | -0.011137 |
| 9                              | H | 0.000373  | 32 | H | 0.000489  |
| 10                             | C | 0.025150  | 33 | C | 0.022750  |
| 11                             | C | -0.022553 | 34 | C | 0.129087  |
| 12                             | H | 0.000430  | 35 | C | 0.017168  |
| 13                             | C | 0.011133  | 36 | C | 0.017256  |
| 14                             | H | -0.000488 | 37 | H | 0.010864  |
| 15                             | C | -0.022745 | 38 | H | 0.010341  |
| 16                             | C | -0.000001 | 39 | H | 0.010922  |
| 17                             | O | 0.000001  | 40 | H | 0.010446  |
| 18                             | C | -0.129087 | 41 | H | -0.010923 |
| 19                             | C | -0.017168 | 42 | H | -0.010446 |
| 20                             | C | -0.017256 | 43 | H | -0.010340 |
| 21                             | O | -0.334792 | 44 | H | -0.010864 |

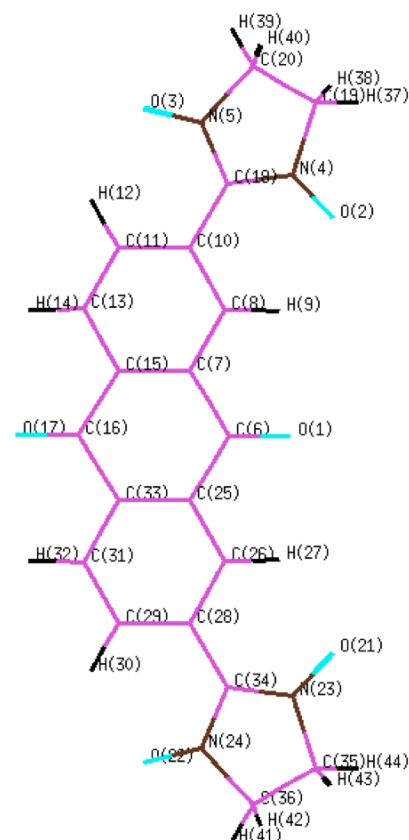

## AQ27diNN triplet

```

1\1\GINC-SKYNET\FOpt\UB97D\6-31G(d)\C20H14N4O6(3)\LAHTI\02-Jan-2015\0\
\#P GFINPUT IOP(6/7=3) UB97D/6-31G(d) TEST OPT GUESS=READ\AntQ27DiNN
triplet opt\0,3\O,-0.0000435681,-1.7169523691,0.000157729\O,4.293485
6695,-2.5278476029,-0.9282155607\O,6.4629665844,1.2095306772,0.8832455
45\N,5.1550041408,-1.7357160561,-0.4356517763\N,6.1989355916,0.0636927
439,0.3987510303\C,-0.0000251238,-0.4839891773,-0.0000269757\C,1.27988
70914,0.2998478962,-0.0085547608\C,2.4950566653,-0.401783807,-0.023610
7399\H,2.4666574036,-1.4875018184,-0.0465827825\C,3.7249094932,0.29352
1505,-0.0123463356\C,3.7141760475,1.714458788,0.0082291016\H,4.6552190
085,2.2568875272,0.0303463051\C,2.503949312,2.4069420432,0.0070738319\
H,2.4857275762,3.4968145289,0.0121902834\C,1.2765025162,1.7182610423,0
.0006949729\C,0.0000188089,2.4987879745,-0.0000945705\O,0.0000369882,3
.7346637068,-0.0001018542\C,4.9909582102,-0.4387568263,-0.0161888772\C
,6.5775708382,-2.1847572834,-0.294887524\C,7.2931353471,-0.9507855011,
0.2668316404\O,-4.2932886254,-2.5276734506,0.9281958617\O,-6.463148836
6,1.2094457065,-0.8833476162\N,-5.1549093375,-1.735622784,0.4356813603

```



\N,-6.1990031436,0.0636728616,-0.3987609352\C,-1.2799135792,0.29988647  
 84,0.0084724319\C,-2.4951035496,-0.4017068532,0.0235655033\H,-2.466738  
 9093,-1.4874252744,0.0465982591\C,-3.7249365525,0.2936296837,0.0122623  
 88\C,-3.7141643616,1.71456875,-0.0083480913\H,-4.655189263,2.257027153  
 8,-0.0304609447\C,-2.5039154128,2.407014879,-0.0072282198\H,-2.4856613  
 334,3.4968867003,-0.0123750478\C,-1.2764879813,1.7182987804,-0.0008411  
 585\C,-4.9909740794,-0.4386678422,0.0161740181\C,-6.5774428495,-2.1847  
 833517,0.2949741534\C,-7.2931229232,-0.9508811018,-0.2667496381\H,6.58  
 57415634,-3.0536098291,0.3770073923\H,6.9234032442,-2.4935192153,-1.29  
 02562903\H,8.0570738689,-0.5304331958,-0.4012460335\H,7.7264575441,-1.  
 0963969804,1.2652354582\H,-8.0570567122,-0.5305597608,0.4013533509\H,-  
 7.726488801,-1.0965589599,-1.2651247553\H,-6.9232156817,-2.4935528244,  
 1.2903608644\H,-6.5855658886,-3.0536495618,-0.3769040369\\Version=EM64  
 L-G09RevB.01\State=3-A\HF=-1439.701644\S2=2.041506\S2-1=0.\S2A=2.00079  
 9\RMSD=5.901e-09\RMSF=4.683e-06\Dipole=0.0000593,-1.1638633,0.0001202\  
 Quadrupole=44.2631351,-27.2429615,-17.0201736,0.001042,-4.4558389,-0.0  
 002722\PG=C01 [X(C20H14N4O6)]\@

| Mulliken atomic spin densities: |   |           |  |    |             |
|---------------------------------|---|-----------|--|----|-------------|
|                                 |   | 1         |  | 22 | O 0.328112  |
| 1                               | O | 0.003075  |  | 23 | N 0.240992  |
| 2                               | O | 0.334585  |  | 24 | N 0.244327  |
| 3                               | O | 0.328100  |  | 25 | C 0.009742  |
| 4                               | N | 0.240994  |  | 26 | C -0.022920 |
| 5                               | N | 0.244325  |  | 27 | H 0.000349  |
| 6                               | C | -0.001371 |  | 28 | C 0.024022  |
| 7                               | C | 0.009742  |  | 29 | C -0.022030 |
| 8                               | C | -0.022920 |  | 30 | H 0.000415  |
| 9                               | H | 0.000350  |  | 31 | C 0.010318  |
| 10                              | C | 0.024022  |  | 32 | H -0.000420 |
| 11                              | C | -0.022029 |  | 33 | C -0.022249 |
| 12                              | H | 0.000415  |  | 34 | C -0.128952 |
| 13                              | C | 0.010318  |  | 35 | C -0.017162 |
| 14                              | H | -0.000420 |  | 36 | C -0.017249 |
| 15                              | C | -0.022249 |  | 37 | H 0.010855  |
| 16                              | C | 0.003209  |  | 38 | H 0.010335  |
| 17                              | O | -0.013735 |  | 39 | H 0.010912  |
| 18                              | C | -0.128952 |  | 40 | H 0.010441  |
| 19                              | C | -0.017162 |  | 41 | H 0.010912  |
| 20                              | C | -0.017249 |  | 42 | H 0.010440  |
| 21                              | O | 0.334574  |  | 43 | H 0.010334  |
|                                 |   |           |  | 44 | H 0.010855  |
|                                 |   |           |  | 44 | H -0.010864 |

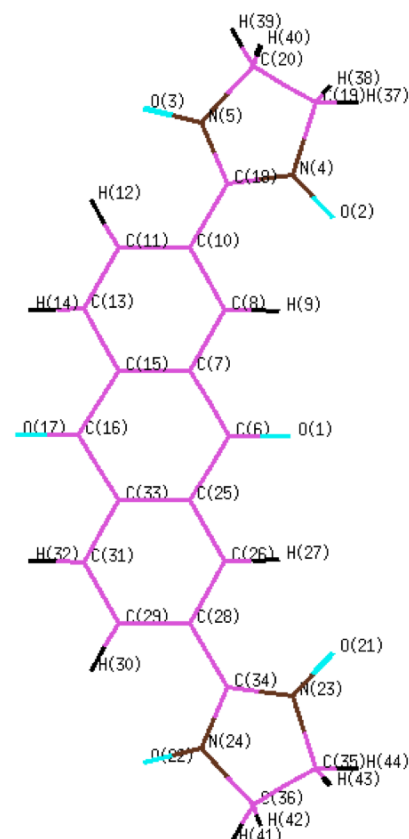

#### BrA27diNN singlet

1\1\GINC-SKYNET\Stability\UB97D\6-31G(d)\C20H15Br1N4O4\LAHTI\26-Sep-20  
 11\0\#P GFINPUT IOP(6/7=3) UB97D/6-31G(d) TEST STABLE=OPT GUESS=(READ  
 ,MIX)\XTL structure of BrAntDiNN\0,1\Br,0,9.655,15.275,1.821\O,0,13.  
 581,15.201,-0.326\O,0,15.972,18.719,1.437\N,0,14.551,15.944,0.054\N,0,  
 15.68,17.623,0.871\C,0,9.655,17.185,1.821\C,0,10.845,17.841,1.491\C,0,  
 12.058,17.181,1.157\H,0,12.079,16.25,1.132\C,0,13.197,17.884,0.873\C,0  
 ,13.176,19.311,0.875\H,0,13.946,19.79,0.669\C,0,12.032,19.963,1.177\H,  
 0,12.031,20.894,1.171\C,0,10.829,19.28,1.501\C,0,9.655,19.949,1.821\H,  
 0,9.655,20.879,1.821\C,0,14.442,17.176,0.59\C,0,15.977,15.552,-0.219\C  
 ,0,16.731,16.569,0.678\O,0,5.73,15.201,3.968\O,0,3.339,18.719,2.206\N,  
 0,4.76,15.944,3.589\N,0,3.631,17.623,2.772\C,0,8.466,17.841,2.152\C,0,  
 7.253,17.181,2.486\H,0,7.232,16.25,2.51\C,0,6.114,17.884,2.77\C,0,6.13  
 5,19.311,2.768\H,0,5.365,19.79,2.973\C,0,7.279,19.963,2.466\H,0,7.28,2  
 0.894,2.471\C,0,8.482,19.28,2.141\C,0,4.869,17.176,3.052\C,0,3.334,15.  
 552,3.862\C,0,2.58,16.569,2.965\H,0,16.112427,14.49683,0.044612\H,0,16  
 .135944,15.692964,-1.294212\H,0,17.616855,17.033191,0.229666\H,0,16.96  
 0678,16.196492,1.682839\H,0,1.693906,17.033316,3.412733\H,0,2.349775,1  
 6.196766,1.960184\H,0,3.175056,15.692964,4.937212\H,0,3.198573,14.4968  
 3,3.598388\\Version=EM64L-G09RevB.01\State=1-A\HF=-3862.7816957\S2=1.0  
 36477\S2-1=0.\S2A=0.291583\RMSD=8.271e-09\Dipole=0.0004142,-0.2945369,  
 -0.0000046\Quadrupole=28.7062641,-13.5566767,-15.1495874,0.0065208,-16  
 .4115104,-0.0080038\PG=C01 [X(C20H15Br1N4O4)]\@

| Mulliken atomic spin densities: |    |           |    |   |           |
|---------------------------------|----|-----------|----|---|-----------|
| 1                               |    |           |    |   |           |
| 1                               | Br | 0.000002  | 22 | O | -0.329856 |
| 2                               | O  | 0.339073  | 23 | N | -0.236902 |
| 3                               | O  | 0.330090  | 24 | N | -0.233576 |
| 4                               | N  | 0.236610  | 25 | C | -0.003839 |
| 5                               | N  | 0.233752  | 26 | C | 0.028119  |
| 6                               | C  | 0.000052  | 27 | H | -0.000239 |
| 7                               | C  | 0.003812  | 28 | C | -0.020653 |
| 8                               | C  | -0.028030 | 29 | C | 0.003571  |
| 9                               | H  | 0.000234  | 30 | H | 0.000536  |
| 10                              | C  | 0.020608  | 31 | C | -0.004221 |
| 11                              | C  | -0.003557 | 32 | H | 0.000253  |
| 12                              | H  | -0.000535 | 33 | C | 0.000940  |
| 13                              | C  | 0.004196  | 34 | C | 0.123003  |
| 14                              | H  | -0.000252 | 35 | C | 0.016620  |
| 15                              | C  | -0.000939 | 36 | C | 0.015895  |
| 16                              | C  | -0.000018 | 37 | H | 0.004725  |
| 17                              | H  | 0.000001  | 38 | H | 0.013910  |
| 18                              | C  | -0.122980 | 39 | H | 0.004359  |
| 19                              | C  | -0.016598 | 40 | H | 0.014386  |
| 20                              | C  | -0.015911 | 41 | H | -0.004347 |
| 21                              | O  | -0.339252 | 42 | H | -0.014389 |
|                                 |    |           | 43 | H | -0.013915 |
|                                 |    |           | 44 | H | -0.004739 |

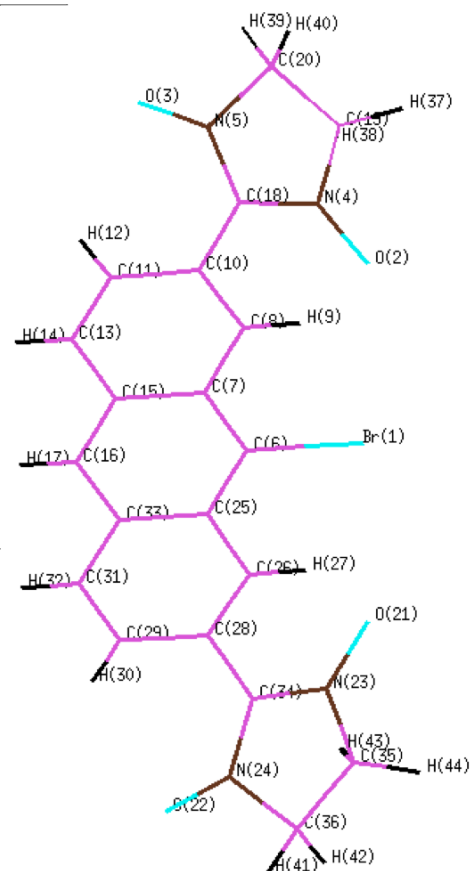

#### BrA27diNN triplet

1\1\GINC-SKYNET\stability\UB97D\6-31G(d)\C20H15BrN4O4(3)\LAHTI\23-Sep-2011\0\#\#P GFINPUT IOP(6/7=3) UB97D/6-31G(d) TEST STABLE=OPT\XTL structure of BrAntDiNN\0,3\Br,0,9.655,15.275,1.821\O,0,13.581,15.201,-0.326\O,0,15.972,18.719,1.437\N,0,14.551,15.944,0.054\N,0,15.68,17.623,0.871\C,0,9.655,17.185,1.821\C,0,10.845,17.841,1.491\C,0,12.058,17.181,1.157\H,0,12.079,16.25,1.132\C,0,13.197,17.884,0.873\C,0,13.176,19.311,0.875\H,0,13.946,19.79,0.669\C,0,12.032,19.963,1.177\H,0,12.031,20.894,1.171\C,0,10.829,19.28,1.501\C,0,9.655,19.949,1.821\H,0,9.655,20.879,1.821\C,0,14.442,17.176,0.59\C,0,15.977,15.552,-0.219\C,0,16.731,16.569,0.678\O,0,5.73,15.201,3.968\O,0,3.339,18.719,2.206\N,0,4.76,15.944,3.589\N,0,3.631,17.623,2.772\C,0,8.466,17.841,2.152\C,0,7.253,17.181,2.486\H,0,7.232,16.25,2.51\C,0,6.114,17.884,2.77\C,0,6.135,19.311,2.768\H,0,5.365,19.79,2.973\C,0,7.279,19.963,2.466\H,0,7.28,20.894,2.471\C,0,8.482,19.28,2.141\C,0,4.869,17.176,3.052\C,0,3.334,15.552,3.862\C,0,2.58,16.569,2.965\H,0,16.112427,14.49683,0.044612\H,0,16.135944,15.692964,-1.294212\H,0,17.616855,17.033191,0.229666\H,0,16.960678,16.196492,1.682839\H,0,1.693906,17.033316,3.412733\H,0,2.349775,16.196766,1.960184\H,0,3.175056,15.692964,4.937212\H,0,3.198573,14.49683,3.598388\Version=EM64L-G09RevB.01\State=3-A\HF=-3862.7817222\S2=2.038871\S2-1=0.\S2A=2.000712\RMSE=9.710e-09\Dipole=0.0004184,-0.2947937,-0.0000068\Quadrupole=28.7071993,-13.5574215,-15.1497778,0.0065301,-16.4116034,-0.0080105\PG=C01 [X(C20H15BrN4O4)]\@

| Mulliken atomic spin densities: |    |           |    |   |           |
|---------------------------------|----|-----------|----|---|-----------|
| 1                               |    |           |    |   |           |
| 1                               | Br | -0.000733 | 22 | O | 0.330200  |
| 2                               | O  | 0.339414  | 23 | N | 0.237318  |
| 3                               | O  | 0.330433  | 24 | N | 0.234003  |
| 4                               | N  | 0.237025  | 25 | C | 0.012982  |
| 5                               | N  | 0.234178  | 26 | C | -0.037451 |
| 6                               | C  | -0.027812 | 27 | H | 0.000654  |
| 7                               | C  | 0.012975  | 28 | C | 0.026773  |
| 8                               | C  | -0.037375 | 29 | C | -0.015002 |
| 9                               | H  | 0.000649  | 30 | H | -0.000012 |
| 10                              | C  | 0.026732  | 31 | C | 0.012057  |
| 11                              | C  | -0.015008 | 32 | H | -0.000558 |
| 12                              | H  | -0.000010 | 33 | C | -0.014759 |
| 13                              | C  | 0.012038  | 34 | C | -0.123604 |
| 14                              | H  | -0.000557 | 35 | C | -0.016651 |
| 15                              | C  | -0.014783 | 36 | C | -0.015928 |
| 16                              | C  | 0.014997  | 37 | H | 0.004758  |
| 17                              | H  | -0.000622 | 38 | H | 0.013932  |
| 18                              | C  | -0.123578 | 39 | H | 0.004393  |
| 19                              | C  | -0.016629 | 40 | H | 0.014409  |
| 20                              | C  | -0.015945 | 41 | H | 0.004382  |
| 21                              | O  | 0.339593  | 42 | H | 0.014412  |
|                                 |    |           | 43 | H | 0.013938  |
|                                 |    |           | 44 | H | 0.004771  |



## A26diIN singlet

```

1\1\GINC-SKYNET\SP\UB97D\6-31G(d)\C20H16N4O2\LAHTI\04-Jan-2015\0\#\P G
FINPUT IOP(6/7=3) UB97D/6-31G(d) TEST GUESS=(READ,MIX)\Ant26DiIN trip
let opt geom (frozen)\0,1\H,0,-3.0846,-3.666016,0.000075\C,0,-2.20620
5,-3.022382,0.000089\H,0,-3.324543,-1.193644,0.00011\C,0,-2.333732,-1.
65392,0.000118\C,0,0.233667,-2.845356,0.000109\C,0,-1.182127,-0.799388
,0.000139\C,0,-0.903795,-3.644678,0.000083\C,0,0.131569,-1.419955,0.00
0139\C,0,-1.279815,0.602167,0.000144\H,0,2.266983,-1.071441,0.00013\H,
0,1.22127,-3.299299,0.000077\C,0,-0.131569,1.419955,0.000139\H,0,-2.26
6983,1.071441,0.00013\C,0,-0.233667,2.845356,0.000109\C,0,1.182127,0.7
99388,0.000139\H,0,3.324543,1.193644,0.00011\C,0,1.279815,-0.602167,0.
000144\C,0,0.903795,3.644678,0.000083\H,0,-1.22127,3.299299,0.000077\C
,0,2.206205,3.022382,0.000089\H,0,3.0846,3.666016,0.000075\C,0,2.33373
2,1.65392,0.000118\C,0,-0.863158,-5.119567,0.000088\C,0,0.863158,5.119
567,0.000088\N,0,0.340439,-5.874968,-0.000353\N,0,-1.939318,-5.860807,
0.00046\N,0,-0.340439,5.874968,-0.000353\N,0,1.939318,5.860807,0.00046
\O,0,1.545213,-5.475533,-0.000979\O,0,-1.545213,5.475533,-0.000979\C,0
,0.001307,7.326127,-0.000031\H,0,-0.444928,7.784031,0.895043\H,0,-0.44
4746,7.784395,-0.894999\C,0,1.545213,7.280665,0.000183\H,0,1.978076,7.
771539,-0.886822\H,0,1.977869,7.771866,0.8871\C,0,-0.001307,-7.326127,
-0.000031\H,0,0.444928,-7.784031,0.895043\H,0,0.444746,-7.784395,-0.89
4999\C,0,-1.545213,-7.280665,0.000183\H,0,-1.977869,-7.771866,0.8871\H
,0,-1.978076,-7.771539,-0.886822\Version=EM64L-G09RevB.01\HF=-1140.27
37196\S2=1.021029\S2-1=0.\S2A=0.169723\RMSD=8.244e-09\Dipole=-0.000004
,-0.0000048,0.0003845\Quadrupole=-15.7861682,29.573445,-13.7872768,5.7
241402,0.,0.\PG=C02 [X(C20H16N4O2)]\ \@

```

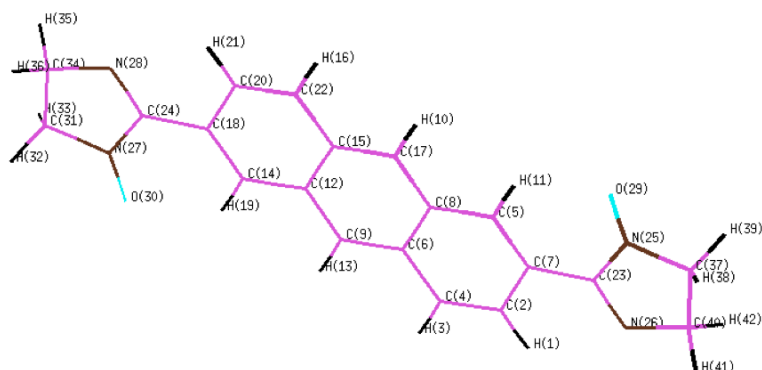

| Mulliken atomic spin densities: |   |           |    |   |           |
|---------------------------------|---|-----------|----|---|-----------|
| 1                               |   |           |    |   |           |
| 1                               | H | -0.000128 | 21 | H | 0.000127  |
| 2                               | C | -0.011106 | 22 | C | -0.010525 |
| 3                               | H | -0.000524 | 23 | C | -0.090995 |
| 4                               | C | 0.010520  | 24 | C | 0.090995  |
| 5                               | C | -0.025792 | 25 | N | 0.323934  |
| 6                               | C | -0.009186 | 26 | N | 0.301953  |
| 7                               | C | 0.020687  | 27 | N | -0.323934 |
| 8                               | C | 0.010590  | 28 | N | -0.301953 |
| 9                               | C | 0.014162  | 29 | O | 0.458551  |
| 10                              | H | 0.000647  | 30 | O | -0.458551 |
| 11                              | H | -0.000674 | 31 | C | 0.022452  |
| 12                              | C | -0.010592 | 32 | H | -0.018931 |
| 13                              | H | -0.000647 | 33 | H | -0.018914 |
| 14                              | C | 0.025797  | 34 | C | 0.014534  |
| 15                              | C | 0.009188  | 35 | H | -0.009950 |
| 16                              | H | 0.000524  | 36 | H | -0.009935 |
| 17                              | C | -0.014161 | 37 | C | -0.022452 |
| 18                              | C | -0.020691 | 38 | H | 0.018931  |
| 19                              | H | 0.000674  | 39 | H | 0.018914  |
| 20                              | C | 0.011111  | 40 | C | -0.014534 |
|                                 |   |           | 41 | H | 0.009935  |
|                                 |   |           | 42 | H | 0.009950  |

## A26diIN triplet

```

1\1\GINC-SKYNET\FOpt\UB97D\6-31G(d)\C20H16N4O2(3)\LAHTI\03-Jan-2015\0\
\#P GFINPUT IOP(6/7=3) UB97D/6-31G(d) TEST OPT\Ant26DiIN triplet opt\
\0,3\H,3.9958199541,-2.6434555104,0.0106051716\C,3.2556221331,-1.84473
68842,0.0106193794\H,1.5673244233,-3.1655751712,0.010640229\C,1.910840
7089,-2.1284839105,0.0106482758\C,2.7997339565,0.5586935492,0.01063900
99\C,0.9297824935,-1.082566966,0.0106694071\C,3.724324781,-0.479511188
8,0.0106125303\C,1.3954707376,0.2936724842,0.0106694364\C,-0.451298933
2,-1.3404705261,0.0106735891\H,0.8041713679,-2.3749754003,0.010660318\H
,3.1373270787,1.5918712782,0.0106065145\C,-1.3954707376,-0.2936724842,
0.0106694364\H,-0.8041713679,-2.3749754003,0.010660318\C,-2.7997339565
,-0.5586935492,0.0106390099\C,-0.9297824935,1.082566966,0.0106694071\H
,-1.5673244233,3.1655751712,0.010640229\C,0.4512989332,1.3404705261,0.
0106735891\C,-3.724324781,0.4795111888,0.0106125303\H,-3.1373270787,-1
.5918712782,0.0106065145\C,-3.2556221331,1.8447368842,0.0106193794\H,-
3.9958199541,2.6434555104,0.0106051716\C,-1.9108407089,2.1284839105,0.
0106482758\C,5.1848028109,-0.2698646595,0.0106182814\C,-5.1848028109,0
.2698646595,0.0106182814\N,5.7970714066,1.0124790364,0.0101774195\N,6.
0446594411,-1.253838396,0.0109898635\N,-5.7970714066,-1.0124790364,0.0
101774195\N,-6.0446594411,1.253838396,0.0109898635\O,5.2620002837,2.16
3446559,0.0095505182\O,-5.2620002837,-2.163446559,0.0095505182\C,-7.27
78633936,-0.8395457067,0.010498749\H,-7.6815257235,-1.3353869558,0.905
5730346\H,-7.6819086919,-1.3352480926,-0.884469404\C,-7.4099016927,0.6
993756969,0.0107133483\H,-7.9472124599,1.0730391337,-0.8762922428\H,-7
.9475136759,1.0727962765,0.8976295713\C,7.2778633936,0.8395457067,0.01
0498749\H,7.6815257235,1.3353869558,0.9055730346\H,7.6819086919,1.3352
480926,-0.884469404\C,7.4099016927,-0.6993756969,0.0107133483\H,7.9475
136759,-1.0727962765,0.8976295713\H,7.9472124599,-1.0730391337,-0.8762
922428\\Version=EM64L-G09RevB.01\State=3-B\HF=-1140.2736957\S2=2.01930
7\S2-1=0.\S2A=2.000199\RMSD=5.278e-09\RMSF=5.374e-05\Dipole=0.,0.,0.00
03852\Quadrupole=30.2626957,-16.4833182,-13.7793775,-0.3839259,0.,0.\P
G=C02 [X(C20H16N4O2)]\@

```

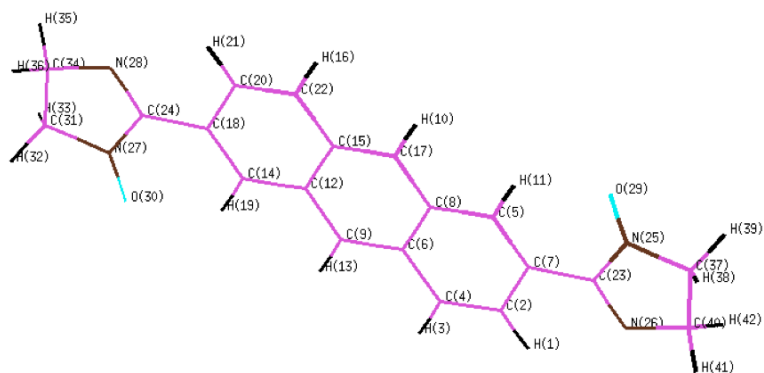

| Mulliken atomic spin densities: |   |           |                |
|---------------------------------|---|-----------|----------------|
| 1                               | H | -0.000333 | 21 H -0.000333 |
| 2                               | C | -0.006396 | 22 C 0.005297  |
| 3                               | H | -0.000278 | 23 C -0.090078 |
| 4                               | C | 0.005297  | 24 C -0.090078 |
| 5                               | C | -0.020180 | 25 N 0.323815  |
| 6                               | C | -0.002965 | 26 N 0.299833  |
| 7                               | C | 0.013771  | 27 N 0.323815  |
| 8                               | C | 0.001536  | 28 N 0.299833  |
| 9                               | C | -0.002361 | 29 O 0.458484  |
| 10                              | H | 0.000109  | 30 O 0.458484  |
| 11                              | H | -0.000899 | 31 C -0.022441 |
| 12                              | C | 0.001536  | 32 H 0.018926  |
| 13                              | H | 0.000109  | 33 H 0.018909  |
| 14                              | C | -0.020180 | 34 C -0.014424 |
| 15                              | C | -0.002965 | 35 H 0.009846  |
| 16                              | H | -0.000278 | 36 H 0.009831  |
| 17                              | C | -0.002361 | 37 C -0.022441 |
| 18                              | C | 0.013771  | 38 H 0.018926  |
| 19                              | H | -0.000899 | 39 H 0.018909  |
| 20                              | C | -0.006396 | 40 C -0.014424 |
|                                 |   |           | 41 H 0.009831  |
|                                 |   |           | 42 H 0.009846  |

## A26diNN singlet

```

1\1\GINC-SKYNET\SP\UB97D\6-31G(d)\C20H16N4O4\LAHTI\04-Jan-2015\0\#\#P G
FINPUT IOP(6/7=3) UB97D/6-31G(d) TEST GUESS=(READ,MIX)\Ant26DiNN trip
let opt geom\0,1\H,0,-4.081207,2.506808,0.021676\C,0,-3.324367,1.7283
07,0.007915\H,0,-1.684794,3.103927,-0.006158\C,0,-1.988311,2.05458,-0.
000546\C,0,-2.774211,-0.659904,-0.002061\C,0,-0.968684,1.04822,-0.0007
24\C,0,-3.742389,0.344801,0.008416\C,0,-1.383545,-0.344953,-0.001453\C
,0,0.401361,1.357284,-0.002228\H,0,-0.716113,-2.403894,-0.004379\H,0,-
3.074038,-1.704578,-0.018404\C,0,1.383556,0.34504,-0.001481\H,0,0.7161
23,2.403981,-0.004632\C,0,2.774222,0.65999,-0.002115\C,0,0.968695,-1.0
48135,-0.000609\H,0,1.684801,-3.103847,-0.005796\C,0,-0.40135,-1.35719
7,-0.002086\C,0,3.742385,-0.344725,0.008449\H,0,3.074071,1.704657,-0.0
18581\C,0,3.324373,-1.728227,0.00811\H,0,4.081222,-2.506723,0.021983\C
,0,1.988319,-2.0545,-0.000312\C,0,-5.164386,0.006329,0.005633\C,0,5.16
4379,-0.006306,0.005655\N,0,-5.692652,-1.210527,-0.353967\N,0,-6.18836
9,0.853389,0.35542\N,0,5.692724,1.21054,-0.353862\N,0,6.188287,-0.8534
91,0.355325\O,0,-5.090499,-2.256701,-0.759397\O,0,-6.128988,2.048017,0
.791321\O,0,6.128772,-2.048179,0.791045\O,0,5.090638,2.256797,-0.75918
2\C,0,7.184916,1.222103,-0.251235\H,0,7.463796,2.006884,0.465511\H,0,7
.581142,1.481494,-1.242148\C,0,7.525808,-0.198095,0.210672\H,0,8.10543
,-0.780667,-0.518682\H,0,8.022513,-0.248345,1.188771\C,0,-7.184847,-1.
222199,-0.251401\H,0,-7.463719,-2.007177,0.465129\H,0,-7.581024,-1.481
352,-1.242398\C,0,-7.525833,0.197859,0.210844\H,0,-8.022388,0.247834,1
.189036\H,0,-8.105651,0.780512,-0.518287\Version=EM64L-G09RevB.01\Sta
te=1-A\HF=-1290.5408354\S2=1.045859\S2-1=0.\S2A=0.365323\RMSD=4.875e-0
9\Dipole=0.0002006,-0.0000872,-0.0678302\Quadrupole=40.0961607,-22.468
7236,-17.6274371,11.9910469,0.0010591,-0.001743\PG=C01 [X(C20H16N4O4)]
\@

```

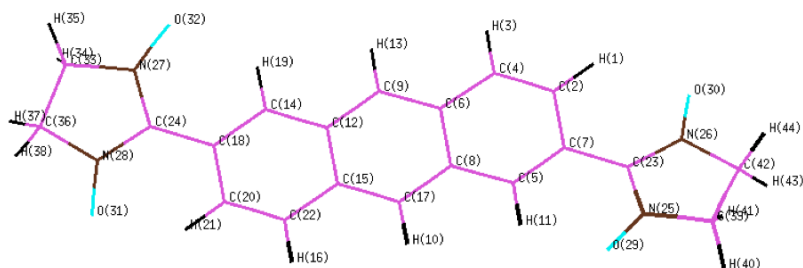

| Mulliken atomic spin densities: |   |           |
|---------------------------------|---|-----------|
| 1                               | H | 0.000033  |
| 2                               | C | -0.017011 |
| 3                               | H | -0.000889 |
| 4                               | C | 0.017898  |
| 5                               | C | -0.047860 |
| 6                               | C | -0.016463 |
| 7                               | C | 0.035835  |
| 8                               | C | 0.020222  |
| 9                               | C | 0.029305  |
| 10                              | H | 0.001334  |
| 11                              | H | 0.001356  |
| 12                              | C | -0.020224 |
| 13                              | H | -0.001334 |
| 14                              | C | 0.047867  |
| 15                              | C | 0.016465  |
| 16                              | H | 0.000889  |
| 17                              | C | -0.029304 |
| 18                              | C | -0.035837 |
| 19                              | H | -0.001356 |
| 20                              | C | 0.017015  |
| 21                              | H | -0.000033 |
| 22                              | C | -0.017902 |
| 23                              | C | -0.128065 |
| 24                              | C | 0.128061  |
| 25                              | N | 0.246820  |
| 26                              | N | 0.245607  |
| 27                              | N | -0.246824 |
| 28                              | N | -0.245607 |
| 29                              | O | 0.328737  |
| 30                              | O | 0.330159  |
| 31                              | O | -0.330149 |
| 32                              | O | -0.328744 |
| 33                              | C | 0.017335  |
| 34                              | H | -0.011339 |
| 35                              | H | -0.010367 |
| 36                              | C | 0.017332  |
| 37                              | H | -0.011237 |
| 38                              | H | -0.010292 |
| 39                              | C | -0.017334 |
| 40                              | H | 0.011336  |
| 41                              | H | 0.010370  |
| 42                              | C | -0.017332 |
| 43                              | H | 0.010295  |
| 44                              | H | 0.011234  |

## A26diNN triplet

```

1\1\GINC-SKYNET\Fopt\UB97D\6-31G(d)\C20H16N4O4(3)\LAHTI\03-Jan-2015\0\
\#P GFINPUT IOP(6/7=3) UB97D/6-31G(d) TEST OPT\Ant26DiNN triplet opt\
\0,3\H,4.0742210384,-2.5123164747,0.0267742349\C,3.3195876615,-1.73168
32729,0.0125642756\H,1.6760863451,-3.1026429534,0.0025136905\C,1.98259
95702,-2.0541579786,0.0060854488\C,2.7762302889,0.6580671123,-0.000709
48\C,0.9658453505,-1.0448964119,0.0053716799\C,3.7415514455,-0.3493766
385,0.0103564228\C,1.3846737144,0.3470845733,0.0019210853\C,-0.4050760
921,-1.3500532856,0.0058578179\H,0.7231102744,2.4079134045,-0.00363884
39\H,3.079015335,1.7018536728,-0.0190805812\C,-1.3843803028,-0.3350126
979,0.0060190341\H,-0.7228223499,-2.3958510637,0.0055023204\C,-2.77593
84557,-0.6459961627,0.007407465\C,-0.9655497783,1.0569728126,0.0041691
199\H,-1.6757993096,3.114708183,-0.0035931934\C,0.405368344,1.36212325
3,0.0007025629\C,-3.7412215749,0.361491448,0.0173833106\H,-3.078781843
3,-1.689829395,-0.0070294226\C,-3.3192686539,1.7437933392,0.014334031\
H,-4.0738808324,2.5244669489,0.0277589216\C,-1.982300532,2.0662405876,
0.0039307304\C,5.1645042332,-0.0149659545,0.005478928\C,-5.1641770771,
0.0271254343,0.0166836128\N,5.6958443985,1.1997912525,-0.3566780809\N,
6.1864490813,-0.8643727842,0.3555357327\N,-5.6963790483,-1.1887921332,
-0.3402750081\N,-6.1852849772,0.8777953636,0.3660818405\O,5.0962338399
,2.2470168738,-0.7631604774\O,6.1241381637,-2.0581155882,0.7934480712\
O,-6.1218898633,2.0730161522,0.7997878582\O,-5.0977195932,-2.237420338
7,-0.7445413377\C,-7.1884851809,-1.1959329092,-0.2360114968\H,-7.46881
99813,-1.9787473606,0.4823155193\H,-7.5865287037,-1.4558049633,-1.2260
695114\C,-7.5248245763,0.2259819696,0.2239485843\H,-8.1035785985,0.809
0160828,-0.5057256037\H,-8.0203186229,0.2792405093,1.2025024742\C,7.18
81773675,1.2073746892,-0.2557502261\H,7.4700651954,1.9927196135,0.4591
963695\H,7.5840109309,1.4637836038,-1.2475976151\C,7.5256180323,-0.212
8959318,0.2084407833\H,8.0230932737,-0.2626939956,1.1861737441\H,8.102
9780634,-0.7983865856,-0.5203677915\\Version=EM64L-G09RevB.01\State=3-
A\HF=-1290.5407237\S2=2.038707\S2-1=0.\S2A=2.000696\RMSD=2.631e-09\RMS
F=4.053e-06\Dipole=-0.0002788,-0.0000218,-0.0678456\Quadrupole=40.1535
881,-22.5334374,-17.6201507,11.8125942,-0.0832063,-0.0031201\PG=C01 [X
(C20H16N4O4)]\@

```

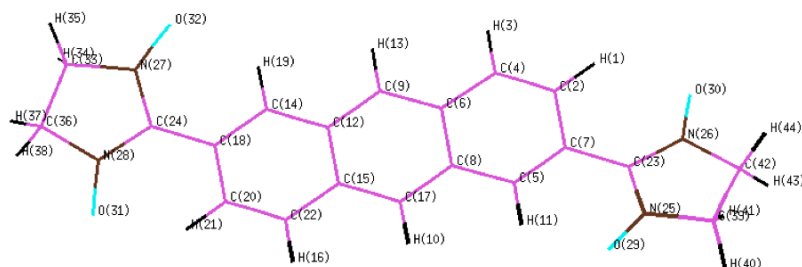

## Mulliken atomic spin densities:

| 1  |   |           | 22 |   |           |
|----|---|-----------|----|---|-----------|
| 1  | H | -0.000347 | 23 | C | -0.125983 |
| 2  | C | -0.007901 | 24 | C | -0.125978 |
| 3  | H | -0.000294 | 25 | N | 0.245180  |
| 4  | C | 0.005408  | 26 | N | 0.243975  |
| 5  | C | -0.036120 | 27 | N | 0.245183  |
| 6  | C | -0.004130 | 28 | N | 0.243974  |
| 7  | C | 0.020910  | 29 | O | 0.327006  |
| 8  | C | 0.002217  | 30 | O | 0.328442  |
| 9  | C | -0.007936 | 31 | O | 0.328431  |
| 10 | H | 0.000382  | 32 | O | 0.327013  |
| 11 | H | 0.000890  | 33 | C | -0.017248 |
| 12 | C | 0.002213  | 34 | H | 0.011211  |
| 13 | H | 0.000382  | 35 | H | 0.010273  |
| 14 | C | -0.036119 | 36 | C | -0.017242 |
| 15 | C | -0.004125 | 37 | H | 0.011110  |
| 16 | H | -0.000293 | 38 | H | 0.010200  |
| 17 | C | -0.007942 | 39 | C | -0.017248 |
| 18 | C | 0.020906  | 40 | H | 0.011208  |
| 19 | H | 0.000890  | 41 | H | 0.010276  |
| 20 | C | -0.007896 | 42 | C | -0.017242 |
| 21 | H | -0.000348 | 43 | H | 0.010203  |
|    |   |           | 44 | H | 0.011106  |

## AQ26diIN singlet

```

1\1\GINC-SKYNET\SP\UB97D\6-31G(d)\C20H14N4O4\LAHTI\04-Jan-2015\0\#\#P G
FINPUT IOP(6/7=3) UB97D/6-31G(d) TEST GUESS=(READ,MIX)\AntQ26DiIN tri
plet opt geom\0,1\H,0,-2.410601,4.173811,-0.000168\C,0,-1.647,3.39689
9,-0.000247\H,0,-3.051574,1.746737,-0.000491\C,0,-2.004854,2.050884,-0
.000435\C,0,0.710664,2.782722,-0.000287\C,0,-1.016205,1.047069,-0.0005
41\C,0,-0.280518,3.7824,-0.000153\C,0,0.349753,1.422759,-0.000495\C,0,
-1.437254,-0.391429,-0.000694\H,0,1.765795,3.039789,-0.000217\C,0,-0.3
49753,-1.422759,-0.000495\C,0,-0.710664,-2.782722,-0.000287\C,0,1.0162
05,-1.047069,-0.000541\H,0,3.051574,-1.746737,-0.000491\C,0,1.437254,0
.391429,-0.000694\C,0,0.280518,-3.7824,-0.000153\H,0,-1.765795,-3.0397
89,-0.000217\C,0,1.647,-3.396899,-0.000247\H,0,2.410601,-4.173811,-0.0
00168\C,0,2.004854,-2.050884,-0.000435\C,0,0.018618,5.232187,0.000051\
C,0,-0.018618,-5.232187,0.000051\N,0,1.332592,5.761882,0.000778\N,0,-0
.915017,6.145717,-0.000357\N,0,-1.332592,-5.761882,0.000778\N,0,0.9150
17,-6.145717,-0.000357\O,0,2.445273,5.15699,0.001436\O,0,-2.445273,-5
.15699,0.001436\C,0,-1.247621,-7.253098,0.00068\H,0,-1.767392,-7.624152
,-0.894385\H,0,-1.766913,-7.624258,0.895971\C,0,0.280518,-7.476469,0.0
0021\H,0,0.62385,-8.033012,0.887152\H,0,0.623267,-8.033552,-0.88661\C,
0,1.247621,7.253098,0.00068\H,0,1.767392,7.624152,-0.894385\H,0,1.7669
13,7.624258,0.895971\C,0,-0.280518,7.476469,0.00021\H,0,-0.623267,8.03
3552,-0.88661\H,0,-0.62385,8.033012,0.887152\O,0,2.630178,0.708409,-0
.000527\O,0,-2.630178,-0.708409,-0.000527\Version=EM64L-G09RevB.01\HF=
-1289.4329079\S2=1.021217\S2-1=0.\S2A=0.170161\RMSD=4.947e-09\Dipole=-
0.0000018,0.000002,-0.0000233\Quadrupole=-30.2598313,43.7106069,-13.4507
756,-2.1636427,0.,0.\PG=C02 [X(C20H14N4O4)]\@

```

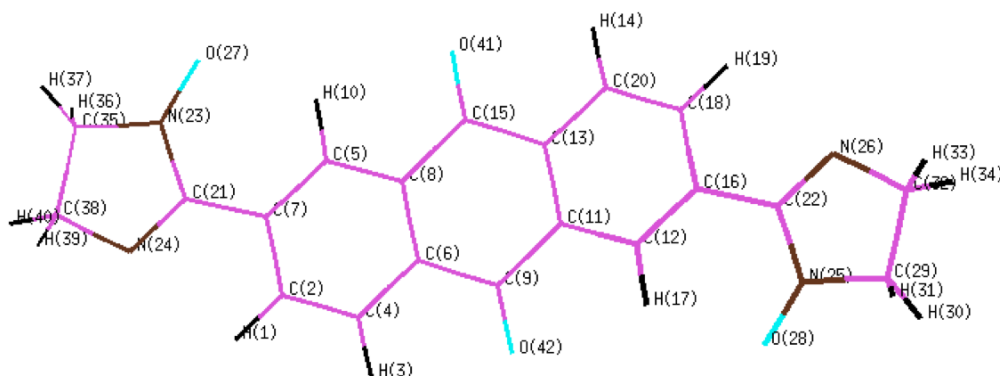

## Mulliken atomic spin densities:

| 1  |   |           |    |   |           |
|----|---|-----------|----|---|-----------|
| 1  | H | -0.000161 | 21 | C | -0.092236 |
| 2  | C | -0.011437 | 22 | C | 0.092235  |
| 3  | H | -0.000246 | 23 | N | 0.305992  |
| 4  | C | 0.005618  | 24 | N | 0.320285  |
| 5  | C | -0.016543 | 25 | N | -0.305993 |
| 6  | C | -0.010841 | 26 | N | -0.320283 |
| 7  | C | 0.016545  | 27 | O | 0.457665  |
| 8  | C | 0.007305  | 28 | O | -0.457665 |
| 9  | C | 0.001685  | 29 | C | 0.021567  |
| 10 | H | -0.000885 | 30 | H | -0.017938 |
| 11 | C | -0.007305 | 31 | H | -0.017924 |
| 12 | C | 0.016543  | 32 | C | 0.015181  |
| 13 | C | 0.010841  | 33 | H | -0.010686 |
| 14 | H | 0.000246  | 34 | H | -0.010671 |
| 15 | C | -0.001685 | 35 | C | -0.021567 |
| 16 | C | -0.016545 | 36 | H | 0.017938  |
| 17 | H | 0.000885  | 37 | H | 0.017924  |
| 18 | C | 0.011437  | 38 | C | -0.015181 |
| 19 | H | 0.000161  | 39 | H | 0.010671  |
| 20 | C | -0.005618 | 40 | H | 0.010686  |
|    |   |           | 41 | O | 0.004002  |
|    |   |           | 42 | O | -0.004002 |

## AQ26diIN triplet

```

1\1\GINC-SKYNET\FOpt\UB97D\6-31G(d)\C20H14N4O4(3)\LAHTI\03-Jan-2015\0\
\#P GFINPUT IOP(6/7=3) UB97D/6-31G(d) TEST OPT\AntQ26DiIN triplet opt
\0,3\H,4.0105981196,-2.6733496116,0.0095350168\C,3.2842633994,-1.8614
896575,0.009614864\H,1.5474092944,-3.1573280312,0.0098583851\C,1.91806
68559,-2.1322718134,0.0098024138\C,2.8225745173,0.5307138508,0.0096541
729\C,0.9797320677,-1.0812722145,0.0099088068\C,3.7566185065,-0.522547
38,0.0095203713\C,1.4422627142,0.2577758278,0.009862101\C,-0.482809737
5,-1.4091875809,0.0100612786\H,3.1467897487,1.5671837313,0.0095847717\
C,-1.4422627142,-0.2577758278,0.009862101\C,-2.8225745173,-0.530713850
8,0.0096541729\C,-0.9797320677,1.0812722145,0.0099088068\H,-1.54740929
44,3.1573280312,0.0098583851\C,0.4828097375,1.4091875809,0.0100612786\
C,-3.7566185065,0.52254738,0.0095203713\H,-3.1467897487,-1.5671837313,
0.0095847717\C,-3.2842633994,1.8614896575,0.009614864\H,-4.0105981196,
2.6733496116,0.0095350168\C,-1.9180668559,2.1322718134,0.0098024138\C,
5.2226073491,-0.3170182801,0.0093163531\C,-5.2226073491,0.3170182801,0
.0093163531\N,5.8354915416,0.9602740844,0.0085898626\N,6.0743722573,-1
.3073260836,0.0097247459\N,-5.8354915416,-0.9602740844,0.0085898626\N,
-6.0743722573,1.3073260836,0.0097247459\O,5.3032132584,2.1094625411,0
.0079310891\O,-5.3032132584,-2.1094625411,0.0079310891\C,-7.3181870107,
-0.7798306339,0.0086873739\H,-7.7218150093,-1.2747309106,0.9037524728\
H,-7.7218902989,-1.2742460066,-0.8866037544\C,-7.4430813378,0.75948907
41,0.0091571879\H,-7.9764564162,1.1378115716,-0.8777851069\H,-7.977032
1906,1.1372642887,0.8959770126\C,7.3181870107,0.7798306339,0.008687373
9\H,7.7218150093,1.2747309106,0.9037524728\H,7.7218902989,1.2742460066
,-0.8866037544\C,7.4430813378,-0.7594890741,0.0091571879\H,7.977032190
6,-1.1372642887,0.8959770126\H,7.9764564162,-1.1378115716,-0.877785106
9\O,0.8756532017,2.5793240143,0.0098945816\O,-0.8756532017,-2.57932401
43,0.0098945816\Version=EM64L-G09RevB.01\State=3-B\HF=-1289.4329069\S
2=2.021229\S2-1=0.\S2A=2.000235\RMSD=5.625e-09\RMSF=5.631e-05\Dipole=0
.,0.,0.0000225\Quadrupole=43.1290927,-29.6786546,-13.4504381,-6.881128
6,0.,0.\PG=C02 [X(C20H14N4O4)]\@

```

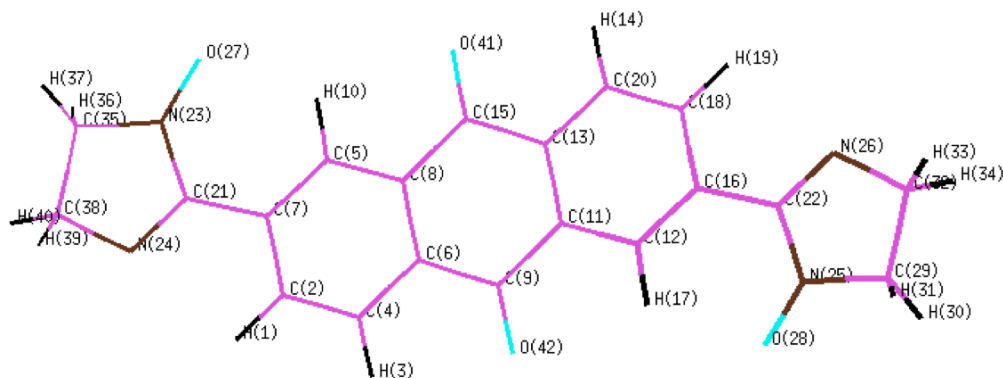

| Mulliken atomic spin densities: |   |           |    |   |           |
|---------------------------------|---|-----------|----|---|-----------|
| 1                               | H | -0.000142 | 21 | C | -0.092206 |
| 2                               | C | -0.011832 | 22 | C | -0.092206 |
| 3                               | H | -0.000256 | 23 | N | 0.306006  |
| 4                               | C | 0.005739  | 24 | N | 0.320209  |
| 5                               | C | -0.016793 | 25 | N | 0.306006  |
| 6                               | C | -0.011047 | 26 | N | 0.320209  |
| 7                               | C | 0.016505  | 27 | O | 0.457686  |
| 8                               | C | 0.007189  | 28 | O | 0.457686  |
| 9                               | C | 0.000296  | 29 | C | -0.021567 |
| 10                              | H | -0.000863 | 30 | H | 0.017939  |
| 11                              | C | 0.007189  | 31 | H | 0.017925  |
| 12                              | C | -0.016793 | 32 | C | -0.015176 |
| 13                              | C | -0.011047 | 33 | H | 0.010682  |
| 14                              | H | -0.000256 | 34 | H | 0.010668  |
| 15                              | C | 0.000296  | 35 | C | -0.021567 |
| 16                              | C | 0.016505  | 36 | H | 0.017939  |
| 17                              | H | -0.000863 | 37 | H | 0.017925  |
| 18                              | C | -0.011832 | 38 | C | -0.015176 |
| 19                              | H | -0.000142 | 39 | H | 0.010668  |
| 20                              | C | 0.005739  | 40 | H | 0.010682  |
|                                 |   |           | 41 | O | -0.000961 |
|                                 |   |           | 42 | O | -0.000961 |

## AQ26diNN singlet

```

1\1\GINC-SKYNET\SP\UB97D\6-31G(d)\C20H14N4O6\LAHTI\04-Jan-2015\0\#\P G
FINPUT IOP(6/7=3) UB97D/6-31G(d) TEST GUESS=(READ,MIX)\AntQ26DiNN tri
plet opt\0,1\H,0,-2.532415,4.099994,-0.036699\C,0,-1.742093,3.354878,
-0.016318\H,0,-3.096049,1.666154,-0.022249\C,0,-2.057319,1.996544,-0.0
16575\C,0,0.635058,2.795923,0.011939\C,0,-1.045305,1.018612,-0.011042\
C,0,-0.384201,3.774175,0.002735\C,0,0.312001,1.43036,-0.002543\C,0,-1.
428323,-0.429139,-0.015048\H,0,1.683109,3.080859,0.033069\C,0,-0.31200
1,-1.43036,-0.002543\C,0,-0.635058,-2.795923,0.011939\C,0,1.045305,-1.
018612,-0.011042\H,0,3.096049,-1.666154,-0.022249\C,0,1.428323,0.42913
9,-0.015048\C,0,0.384201,-3.774175,0.002735\H,0,-1.683109,-3.080859,0.
033069\C,0,1.742093,-3.354878,-0.016318\H,0,2.532415,-4.099994,-0.0366
99\C,0,2.057319,-1.996544,-0.016575\C,0,-0.04672,5.197384,0.007852\C,0
,0.04672,-5.197384,0.007852\N,0,1.152531,5.726469,0.416851\N,0,-0.8792
61,6.211361,-0.395595\N,0,-1.152531,-5.726469,0.416851\N,0,0.879261,-6
.211361,-0.395595\O,0,2.165176,5.127887,0.895324\O,0,-2.057319,6.13678
1,-0.868902\O,0,2.057319,-6.136781,-0.868902\O,0,-2.165176,-5.127887,0
.895324\C,0,-1.169898,-7.218988,0.286169\H,0,-1.996798,-7.483194,-0.38
6713\H,0,-1.368675,-7.632531,1.283807\C,0,0.220686,-7.550508,-0.26728\
H,0,0.838726,-8.161423,0.404493\H,0,0.211459,-8.007728,-1.26569\C,0,1.
169898,7.218988,0.286169\H,0,1.996798,7.483194,-0.386713\H,0,1.368675,
7.632531,1.283807\C,0,-0.220686,7.550508,-0.26728\H,0,-0.211459,8.0077
28,-1.26569\H,0,-0.838726,8.161423,0.404493\O,0,2.611803,0.779662,-0.0
3119\O,0,-2.611803,-0.779662,-0.03119\Version=EM64L-G09RevB.01\HF=-14
39.7017147\S2=1.041509\S2-1=0.\S2A=0.331666\RMSD=7.872e-09\Dipole=-0.0
00018,-0.0000042,0.0445197\Quadrupole=-35.7063852,53.9691747,-18.26278
95,6.7340162,-0.000006,-0.0000455\PG=C02 [X(C20H14N4O6)]\@

```

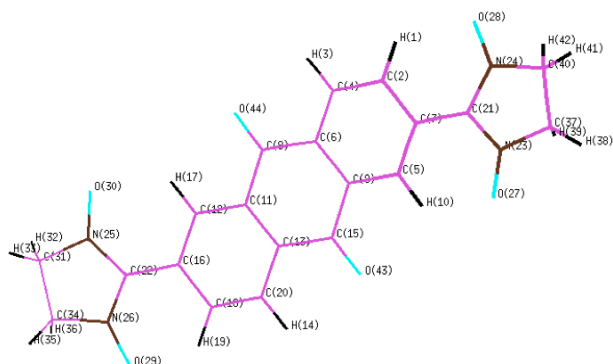

| Mulliken atomic spin densities: |   |           |    |   |           |
|---------------------------------|---|-----------|----|---|-----------|
|                                 |   | 1         | 22 | C | 0.129023  |
|                                 |   |           | 23 | N | 0.241261  |
| 1                               | H | 0.000389  | 24 | N | 0.244350  |
| 2                               | C | -0.021948 | 25 | N | -0.241260 |
| 3                               | H | -0.000442 | 26 | N | -0.244350 |
| 4                               | C | 0.010541  | 27 | O | 0.334408  |
| 5                               | C | -0.022932 | 28 | O | 0.328201  |
| 6                               | C | -0.022325 | 29 | O | -0.328201 |
| 7                               | C | 0.024434  | 30 | O | -0.334408 |
| 8                               | C | 0.010009  | 31 | C | 0.017167  |
| 9                               | C | 0.002352  | 32 | H | -0.010742 |
| 10                              | H | 0.000320  | 33 | H | -0.010476 |
| 11                              | C | -0.010008 | 34 | C | 0.017246  |
| 12                              | C | 0.022930  | 35 | H | -0.010810 |
| 13                              | C | 0.022324  | 36 | H | -0.010559 |
| 14                              | H | 0.000442  | 37 | C | -0.017167 |
| 15                              | C | -0.002351 | 38 | H | 0.010742  |
| 16                              | C | -0.024433 | 39 | H | 0.010476  |
| 17                              | H | -0.000320 | 40 | C | -0.017246 |
| 18                              | C | 0.021947  | 41 | H | 0.010559  |
| 19                              | H | -0.000389 | 42 | H | 0.010810  |
| 20                              | C | -0.010540 | 43 | O | 0.008331  |
| 21                              | C | -0.129025 | 44 | O | -0.008332 |

## AQ26diNN triplet

```

1\1\GINC-SKYNET\FOpt\UB97D\6-31G(d)\C20H14N4O6(3)\LAHTI\03-Jan-2015\0\
\#P GFINPUT IOP(6/7=3) UB97D/6-31G(d) TEST OPT\AntQ26DiNN triplet opt
\0,3\H,4.0982826132,-2.5351835867,0.0316732705\C,3.3537005538,-1.7443
587077,0.0112923586\H,1.6640621584,-3.097173355,0.0172236235\C,1.99515
40828,-2.0586668002,0.0115493067\C,2.7963516604,0.633169606,-0.0169641
828\C,1.0179052334,-1.0459929309,0.0060164467\C,3.773914956,-0.3867499
34,-0.0077603269\C,1.4305699717,0.3110351539,-0.0024820915\C,-0.430103
5879,-1.4280325361,0.0100229881\H,3.0819954911,1.6810276807,-0.0380943
362\C,-1.4305699717,-0.3110351539,-0.0024820915\C,-2.7963516604,-0.633
169606,-0.0169641828\C,-1.0179052334,1.0459929309,0.0060164467\H,-1.66
40621584,3.097173355,0.0172236235\C,0.4301035879,1.4280325361,0.010022
9881\C,-3.773914956,0.386749934,-0.0077603269\H,-3.0819954911,-1.68102
76807,-0.0380943362\C,-3.3537005538,1.7443587077,0.0112923586\H,-4.098
2826132,2.5351835867,0.0316732705\C,-1.9951540828,2.0586668002,0.01154
93067\C,5.1973508805,-0.0502311324,-0.0128777486\C,-5.1973508805,0.050
2311324,-0.0128777486\N,5.7272458192,1.148662376,-0.4218760292\N,6.210
7658766,-0.883456711,0.3905697609\N,-5.7272458192,-1.148662376,-0.4218
760292\N,-6.2107658766,0.883456711,0.3905697609\O,5.1293485418,2.16171
20706,-0.9003498033\O,6.1353901287,-2.0614635025,0.8638769549\O,-6.135
3901287,2.0614635025,0.8638769549\O,-5.1293485418,-2.1617120706,-0.900
3498033\C,-7.2197761259,-1.1650214048,-0.2911946621\H,-7.4845407804,-1
.9917429843,0.3816879\H,-7.6334538311,-1.3635190118,-1.2888326393\C,-7
.550356836,0.2257859642,0.2622541317\H,-8.1608542285,0.8442383228,-0.4
09518756\H,-8.0075830815,0.2168685404,1.2606642698\C,7.2197761259,1.16
50214048,-0.2911946621\H,7.4845407804,1.9917429843,0.3816879\H,7.63345
38311,1.3635190118,-1.2888326393\C,7.550356836,-0.2257859642,0.2622541
317\H,8.0075830815,-0.2168685404,1.2606642698\H,8.1608542285,-0.844238
3228,-0.409518756\O,0.7814260077,2.6112760993,0.0261645645\O,-0.781426
0077,-2.6112760993,0.0261645645\Version=EM64L-G09RevB.01\State=3-B\HF
=-1439.7017173\S2=2.041762\S2-1=0.\S2A=2.00081\RMSD=9.625e-09\RMSF=2.6
29e-05\Dipole=0.,0.,-0.0445058\Quadrupole=53.9852325,-35.7197827,-18.2
654498,6.6733744,0.,0.\PG=C02 [X(C20H14N4O6)]\@

```

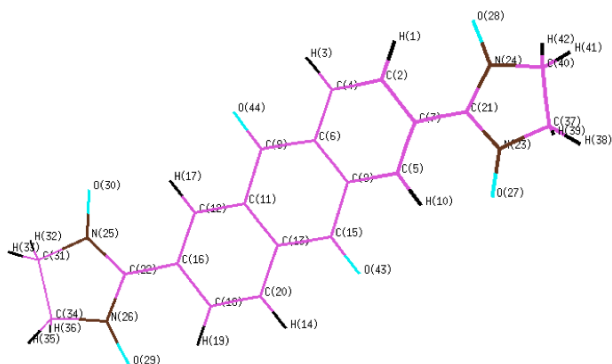

Supplement: Supplementary file 1 [file 5310382]
